# Supplementary material for: AnAnkle Trial study protocol: a randomised trial comparing pain profiles after peripheral nerve block or spinal anaesthesia for ankle fracture surgery
Source: PubMed Central journal article supplement — BMJ Open. 2017 Jun 2;7(5):e016001. doi: 10.1136/bmjopen-2017-016001 (PMC5623423; doi:10.1136/bmjopen-2017-016001), 2017-06-02
Supplement: bmjopen-2017-016001.draft_revisions.pdf [file bmjopen-2017-016001.draft_revisions.pdf]

# BMJ Open

## Ankle Trial study protocol: a randomised trial comparing pain profiles after peripheral nerve block or spinal anaesthesia for ankle fracture surgery

|                                 |                                                                                                                                              |
|---------------------------------|----------------------------------------------------------------------------------------------------------------------------------------------|
| Journal:                        | <i>BMJ Open</i>                                                                                                                              |
| Manuscript ID                   | bmjopen-2017-016001                                                                                                                          |
| Article Type:                   | Protocol                                                                                                                                     |
| Date Submitted by the Author:   | 17-Jan-2017                                                                                                                                  |
| Complete List of Authors:       | Sort, Rune; Herlev Hospital, Dept. of Anaesthesiology<br>Brorson, Stig; Herlev Hospital<br>Gögenür, Ismail<br>Møller, Ann; Herlev Hospital   |
| <b>Primary Subject Heading</b>: | Anaesthesia                                                                                                                                  |
| Secondary Subject Heading:      | Surgery, Patient-centred medicine                                                                                                            |
| Keywords:                       | Anaesthesia in orthopaedics < ANAESTHETICS, Pain management < ANAESTHETICS, Adult anaesthesia < ANAESTHETICS, Clinical trials < THERAPEUTICS |
|                                 |                                                                                                                                              |

SCHOLARONE™  
Manuscripts

## Title

**AnAnkle Trial study protocol: a randomised trial comparing pain profiles after peripheral nerve block or spinal anaesthesia for ankle fracture surgery.**

Rune Sort<sup>1</sup>, Stig Brorson<sup>2</sup>, Ismail Gögenur<sup>3</sup>, Ann Merete Møller<sup>1</sup>

<sup>1</sup>Department of Anaesthesiology, Herlev and Gentofte University Hospital, Denmark.

<sup>2</sup>Department of Orthopaedic Surgery, Herlev and Gentofte University Hospital, Denmark.

<sup>3</sup>Department of Surgery, Centre for Surgical Science, Zealand University Hospital, Denmark.

### Corresponding Author:

Rune Sort

Department of Anaesthesiology I65N9

Herlev and Gentofte University Hospital

Herlev Ringvej 75

2730 Herlev, Denmark

[sort@dadlnet.dk](mailto:sort@dadlnet.dk)

Tel: +45 38 68 60 30

**Keywords:** Peripheral nerve block, regional anaesthesia, ankle fracture, postoperative pain, rebound pain

**Word count:** 3930 words

## Abstract

**Introduction:** Ankle fracture surgery is a common procedure but the influence of anaesthesia choice on postoperative pain and quality of recovery is poorly understood. Some authors suggest a benefit of peripheral nerve block (PNB) in elective procedures, but the different pain profile following acute fracture surgery and rebound pain upon cessation of the PNB remain unexplored. We present an ongoing randomised study aiming to compare primary PNB anaesthesia with spinal anaesthesia for ankle fracture surgery regarding postoperative pain profiles and quality of recovery.

**Methods and analysis:** AnAnkle Trial is a randomised, dual centre, open label, blinded analysis trial of 150 adult patients undergoing primary internal fixation of an ankle fracture. Main exclusion criteria are habitual opioid use, impaired pain sensation, other painful injuries or cognitive impairment. The intervention is ultrasound guided popliteal sciatic (20 ml) and saphenal nerve (8 ml) PNB with ropivacaine 7.5 mg/ml and controls receive spinal anaesthesia (2 ml) with hyperbaric bupivacaine 5 mg/ml. Postoperatively all receive paracetamol, ibuprofen and patient controlled i.v. morphine on demand. Morphine consumption and pain scores are registered in the first 27 hours and reported as an integrated pain score (IPS) as the primary endpoint. Pain score intervals are three hours and we will use the area under curve to get a longitudinal measure of pain. Secondary outcomes include rebound pain upon cessation of anaesthesia, opioid side effects (opioid related symptom distress score, OR-SDS), quality of recovery (QoR-15 score) and pain scores and medication day 1-7 (diary).

**Ethics and dissemination:** The study has been approved by the Regional Ethics Committees in the Capital Region of Denmark, the Danish Data Protection Agency and the Danish Health and Medical Authority. We will publish the results in international peer-reviewed medical journals.

**Registration details:** AnAnkle Trial is registered in The European Clinical Trials Database (EudraCT 2015-001108-76).

## Strengths and limitations of this study

- This is the first trial to thoroughly investigate the postoperative pain profile and directly compare the most commonly used regional anaesthesia techniques for ankle fracture surgery.
- The trial is randomised and designed with attention to allocation concealment and stratification to prevent selection bias.
- The primary endpoint is a composite measure of pain and morphine consumption, which holds more statistical power than when analysing either of the two components alone.
- Blinding of participants and investigators is not feasible, thus the trial is open labelled with blinded data analysis.

## Introduction

Peripheral nerve blocks (PNB) are getting increasingly popular for both primary anaesthesia and postoperative pain control in orthopaedic limb surgery, but its suitability for acute fracture surgery is not well established.

Ankle fracture is a common acute condition, which often requires surgery.[1,2] There is no evidence based consensus regarding the best choice of anaesthesia modality for this high volume procedure and the influence of this choice on the postoperative pain profile is poorly understood. Spinal anaesthesia (SA) is most common, but PNBs are becoming widely implemented, as they provide long lasting pain control and are regarded very safe.[3–7] There is some evidence that PNBs used in elective surgical procedures on knee, ankle and foot are effective in reducing pain, opioid consumption, and related side effects such as nausea and vomiting, as well as potentially reducing length of hospital stay and increasing patient satisfaction.[4,8–16] However, PNBs can represent a logistical challenge in the acute setting and, moreover, the pain profile following fractures and fracture surgery is naturally different from that of conditions requiring elective surgery.

Very few studies have investigated the efficacy and possible benefits of PNBs in this context and results are incongruous. One randomised study of postoperative pain scores in ankle fracture surgery showed initial benefit with PNB added to general anaesthesia but also revealed a sizeable “rebound pain” upon cessation of the PNBs, which could challenge the overall benefit on the postoperative pain profile.[17] Another randomised study of bimalleolar fracture surgery patients showed a longer postoperative effect of PNB anaesthesia compared with SA measured as time to first analgesic request, but pain levels were not measured.[18] At our centre, a large retrospective study of postoperative opioid consumption in ankle fracture surgery has suggested that the largest benefit of the regional anaesthesia modalities is obtained with PNBs.[19] However, in a prospective exploratory pilot study investigating primary PNB anaesthesia for ankle fracture surgery we also found a clear indication of rebound pain in relation to cessation of the PNB effect, especially in younger individuals (abstract published).[20]

We hypothesise that:

- A. PNB anaesthesia for ankle fracture surgery reduces overall postoperative pain, opioid use and opioid related side-effects compared to SA.
- B. Rebound pain following cessation of PNB anaesthesia is more pronounced than rebound pain following cessation of SA after ankle fracture surgery.
- C. Patient experienced quality of recovery after ankle fracture surgery is better following PNB anaesthesia than following SA.

We therefore aim to assess the postoperative pain profile and quality of recovery after acute ankle fracture surgery in a randomised setting comparing primary PNB anaesthesia with SA.

## Methods and analysis

### *Trial design*

AnAnkle Trial is a prospective, randomised, parallel group, dual centre, open label, blinded analysis trial designed to assess the postoperative pain profile and quality of recovery following ankle fracture surgery under peripheral nerve block anaesthesia compared with spinal anaesthesia. Trial participants are randomly assigned to either SA or PNB anaesthesia as described below. Primary data are patient reported pain scores and on demand morphine consumption reported as an integrated pain score (IPS).

### *Participant eligibility and consent:*

Treating physicians consecutively identify eligible subjects according to the listed criteria. Eligible subjects receive written and oral information and are included after obtaining informed written consent.

Inclusion criteria:

1. Scheduled for internal fixation of an ankle fracture
2. Age  $\geq$  18 years
3. Ability to read and understand Danish and give informed written consent

Exclusion criteria:

1. Allergy towards NSAID, paracetamol, morphine or local anaesthetics
2. Bodyweight < 52 kg; to avoid toxic doses of local anaesthetics
3. Contraindications for SA
4. Current gastro-intestinal bleeding
5. Proximal fibular fracture or multitrauma / other simultaneous fractures
6. Cognitive or psychiatric dysfunction or alcohol/narcotic substance abuse causing expected inability to comply with study protocol
7. No available anaesthesiologist with PNB capability at scheduled time of operation
8. Neuropathy / neurological dysfunction in the lower extremities
9. Habitual daily use of opioids
10. Pregnancy or breastfeeding
11. Infection at anaesthesia injection site
12. Nephropathy requiring dialysis
13. Acute porphyria

### *Recruitment period*

All legislative and ethical approvals were obtained and the trial registered in The European Clinical Trials Database (EudraCT 2015-001108-76) by June 2015.[21,22] Inclusion was initiated in July 2015 and will continue until 150 patients have been included and their primary outcome data secured in an expected inclusion period of 22-24 months.

### *Sample size estimation*

The target sample size for AnAnkle Trial is 150 participants. This estimation for the primary outcome (IPS) is based on the O'Brien Castello formula by calculating Wilcoxon-Mann-Whitney odds (WMW odds) for sample sizing in non-parametric statistics.[23,24] Prior studies have shown a positive correlation between the two parameters on which the IPS is based, i.e. higher pain scores are associated with a higher opioid consumption and vice versa.[23] Using data from our observational study we designed the trial to be able to detect a simultaneous 30 % difference in both morphine consumption and pain scores as we consider this a clinically meaningful difference.

This results in WMW odds = 1.75. With a power of 80 % ( $\beta = 20\%$ ) and two sided significance level  $\alpha = 5\%$  the resulting sample size is 141 patients. Adding 6 % to adjust for protocol violations results in a final sample size of 150 (2 x 75) patients to include.

We also conducted sample size estimations for the following key secondary outcomes, which were all found to be covered by the set sample size to include: rebound NRS-AUC for 6 hrs. with 50 % intergroup difference, rebound IPS 6 hrs. 30 % difference, NRS-AUC 0-27 hrs. 30 % difference, morphine consumption 0-27 hrs. 30 % difference, and quality of recovery score 10 % difference. All outcomes are listed below.

### *Randomisation and allocation concealment*

Randomisation is externally managed, computer generated and irreversible. The allocation and participant trial identification number is retrieved via a secured website with an allocation ratio of 1:1 between PNB and spinal anaesthesia. The sequence is stratified by trial centre and patient age group ( $\leq$  or  $>$  60 years of age) and performed as block randomisation with variable block sizes that are unknown to the investigators to maintain allocation concealment. We thereby follow the ICH Harmonised Tripartite Guideline for Good Clinical Practice (GCP) and minimise possible bias from uneven inclusion between centres and age groups with potentially different pain profiles.

### *Blinding*

The trial is open labelled. Thus, investigators and participants are not blinded, but data will be blinded by an independent consultant before analysis.

1  
2 The difference in anaesthesia application between the groups (spinal in the lower back and PNB at lower  
3 thigh level) combined with the characteristic differences in onset and duration of anaesthesia makes  
4 blinding of both participants and physicians administering the anaesthesia effectively impossible. PNBs  
5 must be administered well before the surgery to ensure sufficient onset time whereas SA is best  
6 administered shortly before surgery to ensure adequate duration. A clear difference in duration of the  
7 anaesthesia effect between groups is expected which renders blinding of data collectors ineffective. Data  
8 for the main outcomes are registered directly by the participants (pain scores) or electronically (morphine  
9 PCA pump). Patients do not need to consult with staff to take morphine. The collected data will be  
10 anonymised and blinded by an external consultant, not otherwise involved in the trial, before statistical  
11 analysis is performed.  
12  
13  
14  
15  
16  
17  
18

### 19 *Interventions*

20 Intervention group: PNB as ultrasound guided popliteal sciatic nerve block and mid-femoral saphenal nerve  
21 block with ropivacaine hydrochloride 7.5 mg/ml. We use a fixed dose of 20 ml (150 mg) for the sciatic nerve  
22 and 8 ml (60 mg) for the saphenal nerve to minimise the risk of toxic reactions. Unsuccessful block of a  
23 single nerve (tibial, peroneal or saphenal), defined as no effect on sensory function after 40-45 minutes or  
24 insufficient effect after 60 minutes, is supplemented with an additional dose of 5 ml or 10 ml provided the  
25 patient is weighing 62-71 kg or  $\geq 72$  kg respectively, thus staying within recommended total dosage of 4  
26 mg/kg of ropivacaine.  
27  
28  
29  
30  
31

32 Control group: standard SA using hyperbaric bupivacaine 5 mg/ml, 2.0 ml.  
33

34 Both groups: small doses of midazolam, propofol or similar can be offered on demand during  
35 administration of spinal or PNB anaesthesia to help remedy any anxiety. Both groups will be offered light to  
36 moderate sedation during the operation with propofol i.v. If necessary, i.v. boluses of short action opioid  
37 such as fentanyl or sufentanil can be administered.  
38  
39  
40

41 Standard postoperative pain medication regimen: tablet paracetamol 1000 mg x 4, tablet ibuprofen 400 mg  
42 x 3 and i.v. morphine via a patient controlled analgesia (PCA) pump system delivering 2.5 mg of morphine  
43 on demand with a 6 minute lock out period. The morphine is changed to tablets 5-10 mg on demand after  
44 27 hours.  
45  
46  
47

### 48 *Outcomes:*

49 **Primary outcome measure:**  
50  
51  
52  
53  
54  
55  
56  
57  
58  
59  
60

- Integrated Pain Score (IPS) for the period 0-27 hours post-anaesthesia. IPS is based on Numeric Rating Scale pain score Area Under the Curve (NRS-AUC) and total morphine consumption. NRS pain score is registered every three hours.

The 27-hour primary study period was defined from experiences gained in the observational pilot study to ensure that we capture the full period of potential rebound pain in both groups. The PNBs lasted a mean of 16.5 hours and rebound pain stabilised and subsided within a maximum of about 6 hours. We chose time of anaesthesia as starting point rather than time of surgery because logistical challenges can result in fairly large variations in time from PNB administration to surgery.

#### Secondary outcome measures:

- Rebound pain: IPS for a 6-hour period from patient-reported time of cessation of the sensory block (PNB or spinal) in the ankle.
- NRS-AUC pain 0-27 hours post-anaesthesia.
- Morphine use 0-27 hours (PCA pump)
- Opioid adverse effects 0-27 hours = Clinically Meaningful Events (CME) assessed with the composite Opioid-Related Symptom Distress Scale (OR-SDS)[25,26]
- Quality of Recovery (Danish QoR-15 score)[27] 0-27 hours
- "Risk patients" i.e. number of patients with IPS +100 to +200 (= high pain *and* high morphine consumption)
- Peak NRS pain score 0-27 hours
- "High pain patients" i.e. number of patients reaching peak NRS  $\geq 7$

#### Tertiary outcome measures:

- NRS pain scores postoperative (PO) days 1-7
- Need for on demand opioids PO day 2-7
- Opioid adverse effects PO day 2 = CMEs assessed by the composite OR-SDS score
- Overall patient satisfaction with anaesthesia form including postoperative pain control, NRS-score
- Adverse events / adverse reactions
- Postoperative nerve related symptoms (PONS) on PO day 7



1  
2 The OR-SDS questionnaire has been validated in English.[25,26,28] We conducted a Danish translation for  
3 AnAnkle Trial using two independent medical doctors, bi-lingual in English and Danish. Disagreements were  
4 discussed with the principal investigator and minor adjustments were made in a second round after testing  
5 the translated version on 8 patients.  
6  
7  
8  
9

### 10 *Data management, audit and safety*

11 Only data necessary for evaluation of the stated outcomes, safety parameters and possible confounders are  
12 collected and only after inclusion and randomisation upon retrieving informed written consent.  
13  
14  
15

16 For every included patient a Case Report Form (CRF) is devised for registration of all data except morphine  
17 use, which is electronically registered by the PCA pump and saved as patient specific files. Data sources  
18 include patient reported pain scores, questionnaires and diary, electronic patient files and the PCA  
19 morphine data files. The NRS pain scores are registered directly by the patients on paper. They also note  
20 the time of return of sensation to the ankle.  
21  
22  
23

24 All data are marked and handled according to GCP standards and legislative permission by the Danish Data  
25 Protection Agency.  
26  
27  
28

#### 29 **Safety:**

30 Any adverse events or reactions (AEs) within five half-lives of the intervention drugs are registered and  
31 classified using the Common Terminology Criteria for Adverse Events (CTCAE)[29]. All severe AEs (SAEs) are  
32 reported to the responsible trial sponsor and followed until stable or resolved. If an SAE meet criteria for  
33 reporting it is forwarded immediately to the Danish Medicines Agency and the Ethics Committee.  
34  
35  
36  
37

38 The trial will be stopped in its entirety in the unlikely event that incidence and severity of adverse events  
39 compromise the safety of trial participants as evaluated by the trial group.  
40  
41

42 AnAnkle Trial is monitored by the independent GCP unit at Copenhagen University Hospital through regular  
43 auditing visits to both trial centres.  
44  
45

### 46 *Protocol violations and participant withdrawal*

#### 47 **Protocol violations:**

- 48 • Failed spinal or PNB (defined as change of anaesthesia modality necessary)
  - 49 • Glucocorticoids or controlled-release opioids administered on the day of surgery
- 50  
51  
52  
53

54 Participants meeting any one of these criteria will not be excluded and data are collected as planned. Data  
55 will be included in an intention-to-treat (ITT) analysis but omitted in per-protocol analyses.  
56  
57  
58

## Participant withdrawal:

Participants can be withdrawn / excluded after randomisation if:

- Surgery is cancelled after administration of anaesthesia. The patient can be re-included later if possible.
- Surgery is rescheduled or changed after randomisation and eligibility is no longer upheld according to the in- and exclusion criteria.
- Postoperative complications make the patient unable to comply with study protocol for obtaining primary data (pain scores and PCA-morphine data for 27 hours).
- Withdrawal of consent, before all primary data are obtained (pain scores and PCA-morphine data for 27 hours).

Participants meeting any of these criteria can be excluded from the trial after randomisation. No data will be analysed and they will be replaced by additional inclusion until the calculated sample size is included for ITT analysis. For safety reasons adverse events will be registered for any excluded patients who have received the intervention (anaesthesia). An overview is shown in the flow diagram (figure).

Withdrawal of consent or failure to comply with the protocol after 27 hours postoperatively will not lead to exclusion from analysis of already collected data.

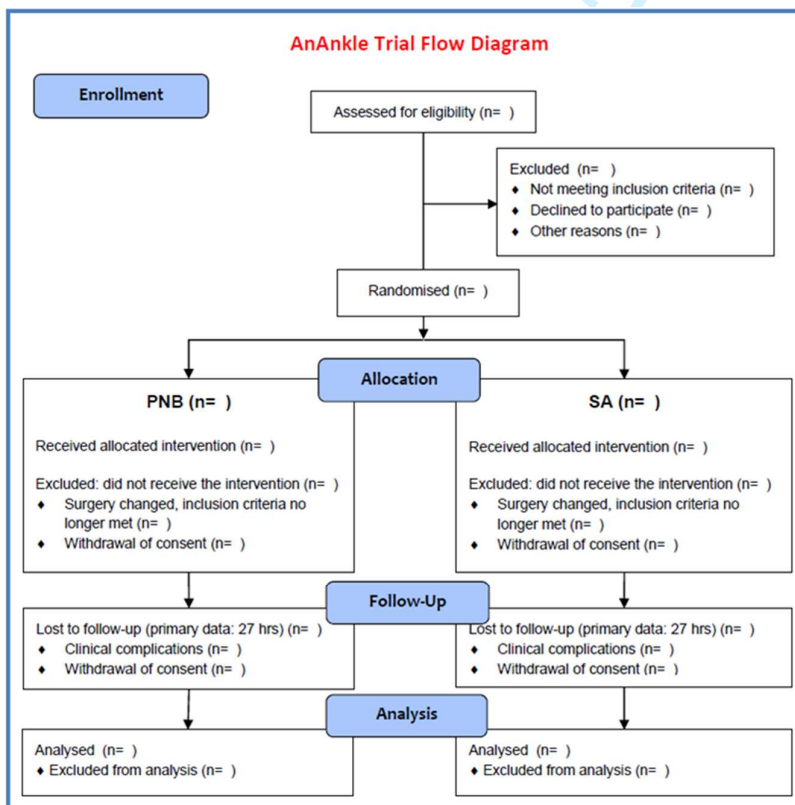

## Statistical plan

### Primary outcome analysis:

Pain scores and morphine data cannot be expected to follow normal distribution and we expect to handle the primary outcome using non-parametric statistics. The Integrated Pain Score has been validated statistically with this in mind.[23] It is derived from pain scores (NRS-AUC in our trial) and total morphine consumption. Both measures are ranked across both trial groups and the IPS is calculated as deviation from mean rank in pain score added to deviation from mean rank in morphine giving a result for each trial participant between -200 % and +200 %. The groups can be compared for significant difference with a distribution-independent permutation test and/or Mann-Whitney test and effect size can be expressed by Ratio of Mean Rank (RoMR) or WMW-odds.[23]

Analysis of the primary outcome will be performed as “intention-to-treat” analysis including all consenting randomised patients not meeting the defined withdrawal criteria. Additional “per-protocol” analyses will be performed and include only participants who follow the protocol without the defined protocol violations.

Two-sided p-values < 0.05 will be considered statistically significant.

### Secondary outcome analyses:

Again, we expect to handle most outcomes using non-parametrical statistics. However, some results such as NRS-AUC measures may prove to resemble a normal distribution which, taken together with the fairly large sample size, warrants the use of parametrical tests in order to obtain confidence intervals on these estimates. In parametric models, we may include adjustment for expected heavy confounders, i.e. age, diabetes and fracture severity (uni-, bi- or trimalleolar), as this can increase the accuracy of the estimate, even though the groups are expected to be comparable due to randomisation.

### Subgroup analyses:

Pain experience is known to vary with age and possibly gender.[30] We have stratified randomisation in two age groups ( $\leq$  or  $>$  60 years of age) and will perform subgroup analysis on relevant outcomes according to age group and gender.

### Accountability procedure for missing data for analysis:

Data for the primary outcome are registered from 0-27 hours from time of anaesthesia. Missing data after this time (till end of participation on postoperative day 7) will not be replaced.

1  
2 Some missing data are expected in the patient reported NRS pain scores from 0-27 hours. Pragmatically we  
3 will fill in a missing measure point with the average of the two adjacent points, in effect drawing a line  
4 between them (linear interpolation), and thus allowing for AUC to be calculated. If the missing point is the  
5 last one (at 27 hours) the value of the last observation is carried forward. If more than two 0-27 hours NRS  
6 scores are missing, the patient will be excluded from per protocol analyses.  
7  
8  
9

10 The measuring of rebound pain is performed over a period of 6 hours following patient evaluated cessation  
11 of the sensory block. Should this period extend beyond the 27-hour-period we will carry forward the last  
12 observation to extrapolate data. As the mean effect duration of the PNBs in our observational study was  
13 around 16 hours we do not expect that extrapolation will be necessary. When appropriate, we will perform  
14 sensitivity analyses to evaluate the impact of data extrapolation.  
15  
16  
17  
18  
19  
20  
21

## 22 **Ethics and dissemination**

### 23 *Ethical and legislative approvals*

24  
25 AnAnkle Trial is conducted in accordance with applicable regulatory requirements and the study protocol,  
26 which is approved by the Regional Ethics Committees in the Capital Region of Denmark, the Danish Data  
27 Protection Agency and the Danish Health and Medical Authority. We follow national and international  
28 standards for good clinical practice (ICH GCP guidelines) and the recommendations of the CONSORT  
29 Statement and extension in reporting randomised clinical pragmatic trials.[31] The protocol was drafted  
30 following the SPIRIT guidelines accordingly.[32] The project is monitored by the Copenhagen GCP unit.  
31  
32  
33  
34  
35  
36

### 37 *Publication plan*

38 We strive to readily publish the results in international peer-reviewed journals and all results will be made  
39 public, regardless of whether they come out positive, negative or inconclusive. Due to the complexity of the  
40 pain profiles, we intend to publish the results in at least two independent articles with focus on the primary  
41 outcome measure and the secondary measure of rebound pain respectively.  
42  
43  
44

45 All authors must fulfil the criteria of the Vancouver convention.  
46  
47  
48  
49

## 50 **Discussion**

51 Regional anaesthesia is often preferred in ankle fracture surgery due to the superior safety profile and  
52 probably better postoperative pain control compared with general anaesthesia.[17,19,33] To the best of  
53 our knowledge, AnAnkle Trial is the first study to thoroughly investigate the postoperative pain profile and  
54  
55  
56  
57  
58  
59  
60

1  
2 test which one of the most frequently used regional anaesthesia techniques is superior. Postoperative pain  
3 studies are often limited by large time intervals between pain registrations. We designed our trial to avoid  
4 this issue since it renders evaluation of the clinical significance of rebound pain impossible, because the  
5 rebound could be very intense yet completely undetected in-between pain scorings.  
6  
7

8  
9 AnAnkle Trial constitutes a scientifically strong setup although blinding of the participants and investigators  
10 is not practically possible which holds a potential risk of bias; e.g. reported pain scores might be affected by  
11 psychological factors influenced by information from the investigators. To minimise this influence, all pain  
12 scores used for the primary outcome are registered by the participants, without consulting the staff.  
13  
14 Likewise, the morphine data are gathered electronically from the PCA pump, which the patient activates  
15 without consulting the staff, thus ensuring a minimal risk of related bias. Finally, data analysis will be  
16 blinded. As in most other clinical trials, there remains a risk of sampling bias due to the eligibility criteria,  
17 which might impair the overall generalisability of our results.  
18  
19  
20  
21

22  
23 Among the strengths of the design are randomisation and attention to sequence generation and allocation  
24 concealment to prevent selection bias between the two groups. The block randomisation and stratification  
25 protect against bias from variability of practice during a relatively long inclusion period on different centres.  
26 We have chosen a composite score of pain assessment and opioid consumption as primary outcome. The  
27 IPS has been thoroughly tested and proven to hold more statistical power than conventional comparisons  
28 of pain scores or morphine alone.[23] There is a natural correlation between the two that can lead to  
29 failure in identifying a true effect, or even lead to finding a false positive effect, on either outcome, when  
30 not balanced by evaluation of the other. In this study we will use the IPS with a longitudinal pain  
31 measurement in the form of AUC pain score rather than a single pain rating. This allows us to illustrate the  
32 pain profile over time without letting the results be compromised by statistical mass significance. The  
33 individual components of the IPS are separately analysed among various secondary endpoints to provide  
34 supplementary details to the composite primary endpoint, as is recommended in the IMMPACT consensus  
35 on pain trials.[34]  
36  
37  
38  
39  
40  
41  
42  
43

44 If AnAnkle Trial yields clear results the implications on clinical practice could be profound. Fracture surgery  
45 is very common and optimising the choice of anaesthesia will have a major influence on the postoperative  
46 recovery and the overall patient course for a very large group of patients.  
47  
48  
49  
50  
51

## 52 **Authors' contributions**

53 Rune Sort: Idea development, study planning, writing first draft, revisions, approving final protocol,  
54 registering and obtaining legislative and ethical approvals.  
55  
56  
57  
58  
59  
60

1  
2  
3 Stig Brorson: Idea development, study planning, draft revisions, approving final protocol.

4 Ismail Gögenur: Idea development, study planning, draft revisions, approving final protocol.

5  
6 Ann Merete Møller: Idea development, study planning, draft revisions, approving final protocol.

## 7 8 9 **Funding statement**

10  
11 This study is supported by the non-profit Danish Society of Anaesthesia and Intensive care Medicine  
12 “DASAIMs Forskningsinitiativ”, the private non-profit foundation “Viggo og Krista Pedersens Fond” and by  
13 the public source “Forskningsrådet Herlev Hospital”. The first author is the sponsor; the funders have no  
14 role in design, conduction or analysis of this trial.  
15  
16  
17

## 18 19 20 **Competing interests statement**

21  
22 None to declare.  
23  
24  
25  
26

## 27 28 **Acknowledgements**

29 We would like to thank Jesper Kent Nielsen, M.D., Consultant Anaesthetist, Herlev and Gentofte University  
30 Hospital, Herlev, Denmark and Nicolai Bang Foss, M.D., DMSc, Consultant Anaesthetist, Hvidovre and  
31 Amager Hospital, Hvidovre, Denmark for valuable input during idea development and drafting of the  
32 protocol. We thank biostatistician Tobias Wirenfeldt Klausen, MSc, Dept. of Haematology, Herlev and  
33 Gentofte Hospital, Herlev, Denmark for statistical assistance and we thank OPEN, Odense Patient data  
34 Explorative Network, Odense University Hospital, Odense, Denmark for the secure online randomisation  
35 solution.  
36  
37  
38  
39  
40  
41  
42

## 43 44 **Data sharing**

45 This is a study protocol so there are no data yet. The trial registration is freely accessible in The European  
46 Clinical Trials Database (EudraCT 2015-001108-76).  
47  
48  
49

## 50 51 **References**

- 52  
53 1 Daly PJ, Fitzgerald RH, Melton LJ, *et al.* Epidemiology of ankle fractures in Rochester, Minnesota.  
54 *Acta Orthop Scand* 1987;**58**:539–44.  
55  
56  
57  
58  
59  
60

- 1  
2  
3  
4  
5  
6  
7  
8  
9  
10  
11  
12  
13  
14  
15  
16  
17  
18  
19  
20  
21  
22  
23  
24  
25  
26  
27  
28  
29  
30  
31  
32  
33  
34  
35  
36  
37  
38  
39  
40  
41  
42  
43  
44  
45  
46  
47  
48  
49  
50  
51  
52  
53  
54  
55  
56  
57  
58  
59  
60
- 2 Court-Brown CM, McBirnie J, Wilson G. Adult ankle fractures--an increasing problem? *Acta Orthop Scand* 1998;**69**:43–7.
  - 3 Watts SA, Sharma DJ. Long-term neurological complications associated with surgery and peripheral nerve blockade: outcomes after 1065 consecutive blocks. *Anaesth Intensive Care* 2007;**35**:24–31.
  - 4 Klein SM, Nielsen KC, Greengrass RA, *et al.* Ambulatory discharge after long-acting peripheral nerve blockade: 2382 blocks with ropivacaine. *Anesth Analg* 2002;**94**:65–70.
  - 5 Jeng CL, Torrillo TM, Rosenblatt MA. Complications of peripheral nerve blocks. *Br J Anaesth* 2010;**105 Suppl**:i97-107. doi:10.1093/bja/aeq273
  - 6 Capdevila X, Pirat P, Bringuier S, *et al.* Continuous peripheral nerve blocks in hospital wards after orthopedic surgery: a multicenter prospective analysis of the quality of postoperative analgesia and complications in 1,416 patients. *Anesthesiology* 2005;**103**:1035–45.
  - 7 Sites BD, Taenzer AH, Herrick MD, *et al.* Incidence of local anesthetic systemic toxicity and postoperative neurologic symptoms associated with 12,668 ultrasound-guided nerve blocks: an analysis from a prospective clinical registry. *Reg Anesth Pain Med* 2012;**37**:478–82. doi:10.1097/AAP.0b013e31825cb3d6
  - 8 Capdevila X, Barthelet Y, Biboulet P, *et al.* Effects of perioperative analgesic technique on the surgical outcome and duration of rehabilitation after major knee surgery. *Anesthesiology* 1999;**91**:8–15.
  - 9 Elliot R, Pearce CJ, Seifert C, *et al.* Continuous infusion versus single bolus popliteal block following major ankle and hindfoot surgery: a prospective, randomized trial. *Foot Ankle Int* 2010;**31**:1043–7. doi:10.3113/FAI.2010.1043
  - 10 White PF, Issioui T, Skrivanek GD, *et al.* The use of a continuous popliteal sciatic nerve block after surgery involving the foot and ankle: does it improve the quality of recovery? *Anesth Analg* 2003;**97**:1303–9.
  - 11 Liu SS, Strodtbeck WM, Richman JM, *et al.* A comparison of regional versus general anesthesia for ambulatory anesthesia: a meta-analysis of randomized controlled trials. *Anesth Analg* 2005;**101**:1634–42. doi:10.1213/01.ANE.0000180829.70036.4F
  - 12 Grosser DM, Herr MJ, Claridge RJ, *et al.* Preoperative lateral popliteal nerve block for intraoperative and postoperative pain control in elective foot and ankle surgery: a prospective analysis. *Foot Ankle Int* 2007;**28**:1271–5. doi:10.3113/FAI.2007.1271
  - 13 Xu J, Chen X, Ma C, *et al.* Peripheral nerve blocks for postoperative pain after major knee surgery. In: Wang X, ed. *Cochrane Database of Systematic Reviews*. Chichester, UK: : John Wiley & Sons, Ltd 2014. CD010937. doi:10.1002/14651858.CD010937.pub2
  - 14 Chan E-Y, Fransen M, Parker DA, *et al.* Femoral nerve blocks for acute postoperative pain after knee replacement surgery. In: Chan E-Y, ed. *Cochrane Database of Systematic Reviews*. Chichester, UK: : John Wiley & Sons, Ltd 2014. CD009941. doi:10.1002/14651858.CD009941.pub2
  - 15 Casati A, Cappelleri G, Berti M, *et al.* Randomized comparison of remifentanyl-propofol with a sciatic-femoral nerve block for out-patient knee arthroscopy. *Eur J Anaesthesiol* 2002;**19**:109–14.
  - 16 Jankowski CJ, Hebl JR, Stuart MJ, *et al.* A comparison of psoas compartment block and spinal and general anesthesia for outpatient knee arthroscopy. *Anesth Analg* 2003;**97**:1003–9, table of contents.

- 1  
2  
3  
4  
5  
6  
7  
8  
9  
10  
11  
12  
13  
14  
15  
16  
17  
18  
19  
20  
21  
22  
23  
24  
25  
26  
27  
28  
29  
30  
31  
32  
33  
34  
35  
36  
37  
38  
39  
40  
41  
42  
43  
44  
45  
46  
47  
48  
49  
50  
51  
52  
53  
54  
55  
56  
57  
58  
59  
60
- 17 Goldstein RY, Montero N, Jain SK, *et al.* Efficacy of popliteal block in postoperative pain control after ankle fracture fixation: a prospective randomized study. *J Orthop Trauma* 2012;**26**:557–61. doi:10.1097/BOT.0b013e3182638b25
- 18 Protić A, Horvat M, Komen-Usljebrka H, *et al.* Benefit of the minimal invasive ultrasound-guided single shot femoro-popliteal block for ankle surgery in comparison with spinal anesthesia. *Wien Klin Wochenschr* 2010;**122**:584–7. doi:10.1007/s00508-010-1451-9
- 19 Christensen KP, Møller AM, Nielsen JK, *et al.* The Effects of Anesthetic Technique on Postoperative Opioid Consumption in Ankle Fracture Surgery. *Clin J Pain* 2016;**32**:870–4. doi:10.1097/AJP.0000000000000335
- 20 Sort R, Brorson S, Gögenur I, *et al.* Peripheral nerve block in primary ankle fracture surgery - exploring rebound pain. *Eur J Anaesthesiol* 2015;**32**:88.
- 21 The European Medicines Agency. EudraCT public website. EMA. <https://eudract.ema.europa.eu/>
- 22 The European Medicines Agency. EU Clinical Trials Register. <https://www.clinicaltrialsregister.eu/>
- 23 Dai F, Silverman DG, Chelly JE, *et al.* Integration of pain score and morphine consumption in analgesic clinical studies. *J Pain* 2013;**14**:767–77.e8. doi:10.1016/j.jpain.2013.04.004
- 24 Noether GE. Sample Size Determination for Some Common Nonparametric Tests. *J Am Stat Assoc* 1987;**82**:645–7. doi:10.1080/01621459.1987.10478478
- 25 Chan KS, Chen W-H, Gan TJ, *et al.* Development and validation of a composite score based on clinically meaningful events for the opioid-related symptom distress scale. *Qual Life Res* 2009;**18**:1331–40. doi:10.1007/s11136-009-9547-2
- 26 Yadeau JT, Liu SS, Rade MC, *et al.* Performance characteristics and validation of the Opioid-Related Symptom Distress Scale for evaluation of analgesic side effects after orthopedic surgery. *Anesth Analg* 2011;**113**:369–77. doi:10.1213/ANE.0b013e31821ae3f7
- 27 Kleif J, Edwards HM, Sort R, *et al.* Translation and validation of the Danish version of the postoperative quality of recovery score QoR-15. *Acta Anaesthesiol Scand* 2015;**59**:912–20. doi:10.1111/aas.12525
- 28 Apfelbaum JL, Gan TJ, Zhao S, *et al.* Reliability and validity of the perioperative opioid-related symptom distress scale. *Anesth Analg* 2004;**99**:699–709, table of contents. doi:10.1213/01.ANE.0000133143.60584.38
- 29 National Institute of Cancer. Common Terminology Criteria for Adverse Events (CTCAE). *NIH Publ* 2010;**2009**:0–71. doi:10.1080/00140139.2010.489653
- 30 Ip HYV, Abrishami A, Peng PWH, *et al.* Predictors of postoperative pain and analgesic consumption: a qualitative systematic review. *Anesthesiology* 2009;**111**:657–77. doi:10.1097/ALN.0b013e3181aae87a
- 31 Moher D, Hopewell S, Schulz KF, *et al.* CONSORT 2010 explanation and elaboration: updated guidelines for reporting parallel group randomised trials. *BMJ* 2010;**340**:c869.
- 32 Chan A-W, Tetzlaff JM, Gøtzsche PC, *et al.* SPIRIT 2013 explanation and elaboration: guidance for protocols of clinical trials. *BMJ* 2013;**346**:e7586.
- 33 Jordan C, Davidovitch RI, Walsh M, *et al.* Spinal anesthesia mediates improved early function and



1  
2 pain relief following surgical repair of ankle fractures. *J Bone Joint Surg Am* 2010;**92**:368–74.  
3 doi:10.2106/JBJS.H.01852  
4

- 5 34 Turk DC, Dworkin RH, McDermott MP, *et al*. Analyzing multiple endpoints in clinical trials of pain  
6 treatments: IMMPACT recommendations. *Pain* 2008;**139**:485–93. doi:10.1016/j.pain.2008.06.025  
7  
8  
9  
10  
11  
12  
13  
14  
15  
16  
17  
18  
19  
20  
21  
22  
23  
24  
25  
26  
27  
28  
29  
30  
31  
32  
33  
34  
35  
36  
37  
38  
39  
40  
41  
42  
43  
44  
45  
46  
47  
48  
49  
50  
51  
52  
53  
54  
55  
56  
57  
58  
59  
60

For peer review only

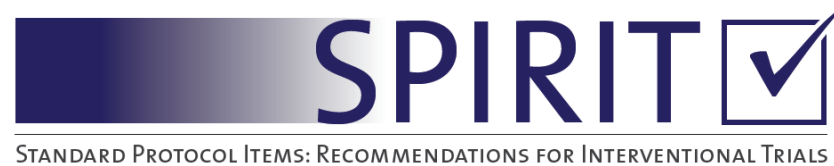

SPIRIT 2013 Checklist: Recommended items to address in a clinical trial protocol and related documents\*

| Section/item                      | Item No | Description                                                                                                                                                                                                                                                                              | Addressed on page number |
|-----------------------------------|---------|------------------------------------------------------------------------------------------------------------------------------------------------------------------------------------------------------------------------------------------------------------------------------------------|--------------------------|
| <b>Administrative information</b> |         |                                                                                                                                                                                                                                                                                          |                          |
| Title                             | 1       | Descriptive title identifying the study design, population, interventions, and, if applicable, trial acronym                                                                                                                                                                             | ___1___                  |
| Trial registration                | 2a      | Trial identifier and registry name. If not yet registered, name of intended registry                                                                                                                                                                                                     | ___5___                  |
|                                   | 2b      | All items from the World Health Organization Trial Registration Data Set                                                                                                                                                                                                                 | ___1,5___                |
| Protocol version                  | 3       | Date and version identifier                                                                                                                                                                                                                                                              | ___N/A___                |
| Funding                           | 4       | Sources and types of financial, material, and other support                                                                                                                                                                                                                              | ___13___                 |
| Roles and responsibilities        | 5a      | Names, affiliations, and roles of protocol contributors                                                                                                                                                                                                                                  | ___1, 12-13___           |
|                                   | 5b      | Name and contact information for the trial sponsor                                                                                                                                                                                                                                       | ___1___                  |
|                                   | 5c      | Role of study sponsor and funders, if any, in study design; collection, management, analysis, and interpretation of data; writing of the report; and the decision to submit the report for publication, including whether they will have ultimate authority over any of these activities | ___13___                 |
|                                   | 5d      | Composition, roles, and responsibilities of the coordinating centre, steering committee, endpoint adjudication committee, data management team, and other individuals or groups overseeing the trial, if applicable (see Item 21a for data monitoring committee)                         | ___8___                  |

1 **Introduction**

2

3 Background and 6a Description of research question and justification for undertaking the trial, including summary of relevant \_\_\_\_\_ 3 \_\_\_\_\_  
 4 rationale studies (published and unpublished) examining benefits and harms for each intervention  
 5

6 6b Explanation for choice of comparators \_\_\_\_\_ 3 \_\_\_\_\_  
 7

8 Objectives 7 Specific objectives or hypotheses \_\_\_\_\_ 3 \_\_\_\_\_  
 9

10 Trial design 8 Description of trial design including type of trial (eg, parallel group, crossover, factorial, single group),  
 11 allocation ratio, and framework (eg, superiority, equivalence, noninferiority, exploratory) \_\_\_\_\_ 4 \_\_\_\_\_  
 12  
 13

14 **Methods: Participants, interventions, and outcomes**

15

16 Study setting 9 Description of study settings (eg, community clinic, academic hospital) and list of countries where data will \_\_\_\_\_ 4 \_\_\_\_\_  
 17 be collected. Reference to where list of study sites can be obtained  
 18

19 Eligibility criteria 10 Inclusion and exclusion criteria for participants. If applicable, eligibility criteria for study centres and \_\_\_\_\_ 4 \_\_\_\_\_  
 20 individuals who will perform the interventions (eg, surgeons, psychotherapists)  
 21

22 Interventions 11a Interventions for each group with sufficient detail to allow replication, including how and when they will be \_\_\_\_\_ 6 \_\_\_\_\_  
 23 administered  
 24

25 11b Criteria for discontinuing or modifying allocated interventions for a given trial participant (eg, drug dose \_\_\_\_\_ 8-9 \_\_\_\_\_  
 26 change in response to harms, participant request, or improving/worsening disease)  
 27

28 11c Strategies to improve adherence to intervention protocols, and any procedures for monitoring adherence \_\_\_\_\_ 6 \_\_\_\_\_  
 29 (eg, drug tablet return, laboratory tests)  
 30

31 11d Relevant concomitant care and interventions that are permitted or prohibited during the trial \_\_\_\_\_ 6 \_\_\_\_\_  
 32

33 Outcomes 12 Primary, secondary, and other outcomes, including the specific measurement variable (eg, systolic blood \_\_\_\_\_ 6-8 \_\_\_\_\_  
 34 pressure), analysis metric (eg, change from baseline, final value, time to event), method of aggregation (eg, \_\_\_\_\_ 6-8 \_\_\_\_\_  
 35 median, proportion), and time point for each outcome. Explanation of the clinical relevance of chosen  
 36 efficacy and harm outcomes is strongly recommended  
 37

38 Participant timeline 13 Time schedule of enrolment, interventions (including any run-ins and washouts), assessments, and visits for \_\_\_\_\_ 9+fig.\_\_\_\_  
 39 participants. A schematic diagram is highly recommended (see Figure)  
 40  
 41  
 42

1 Sample size 14 Estimated number of participants needed to achieve study objectives and how it was determined, including \_\_\_\_\_5\_\_\_\_\_

2 clinical and statistical assumptions supporting any sample size calculations

3

4 Recruitment 15 Strategies for achieving adequate participant enrolment to reach target sample size \_\_\_\_\_5,9+fig.\_\_\_\_

5

6 **Methods: Assignment of interventions (for controlled trials)**

7

8 Allocation:

9

10 Sequence 16a Method of generating the allocation sequence (eg, computer-generated random numbers), and list of any \_\_\_\_\_5\_\_\_\_\_

11 generation factors for stratification. To reduce predictability of a random sequence, details of any planned restriction

12 (eg, blocking) should be provided in a separate document that is unavailable to those who enrol participants

13 or assign interventions

14

15

16 Allocation 16b Mechanism of implementing the allocation sequence (eg, central telephone; sequentially numbered, \_\_\_\_\_5\_\_\_\_\_

17 concealment opaque, sealed envelopes), describing any steps to conceal the sequence until interventions are assigned

18 mechanism

19

20 Implementation 16c Who will generate the allocation sequence, who will enrol participants, and who will assign participants to \_\_\_\_\_4,5\_\_\_\_\_

21 interventions

22

23

24 Blinding (masking) 17a Who will be blinded after assignment to interventions (eg, trial participants, care providers, outcome \_\_\_\_\_5-6\_\_\_\_\_

25 assessors, data analysts), and how

26

27 17b If blinded, circumstances under which unblinding is permissible, and procedure for revealing a participant's \_\_\_\_\_5-6\_\_\_\_\_

28 allocated intervention during the trial

29

30

31 **Methods: Data collection, management, and analysis**

32

33 Data collection 18a Plans for assessment and collection of outcome, baseline, and other trial data, including any related \_\_\_\_\_6-8\_\_\_\_\_

34 methods processes to promote data quality (eg, duplicate measurements, training of assessors) and a description of

35 study instruments (eg, questionnaires, laboratory tests) along with their reliability and validity, if known.

36 Reference to where data collection forms can be found, if not in the protocol

37

38 18b Plans to promote participant retention and complete follow-up, including list of any outcome data to be \_\_\_\_\_8-9\_\_\_\_\_

39 collected for participants who discontinue or deviate from intervention protocols

40

41

42

|    |                                 |     |                                                                                                                                                                                                                                                                                                                                       |                 |
|----|---------------------------------|-----|---------------------------------------------------------------------------------------------------------------------------------------------------------------------------------------------------------------------------------------------------------------------------------------------------------------------------------------|-----------------|
| 1  | Data management                 | 19  | Plans for data entry, coding, security, and storage, including any related processes to promote data quality (eg, double data entry; range checks for data values). Reference to where details of data management procedures can be found, if not in the protocol                                                                     | _____8_____     |
| 2  |                                 |     |                                                                                                                                                                                                                                                                                                                                       |                 |
| 3  |                                 |     |                                                                                                                                                                                                                                                                                                                                       |                 |
| 4  |                                 |     |                                                                                                                                                                                                                                                                                                                                       |                 |
| 5  | Statistical methods             | 20a | Statistical methods for analysing primary and secondary outcomes. Reference to where other details of the statistical analysis plan can be found, if not in the protocol                                                                                                                                                              | _____10_____    |
| 6  |                                 |     |                                                                                                                                                                                                                                                                                                                                       |                 |
| 7  |                                 |     |                                                                                                                                                                                                                                                                                                                                       |                 |
| 8  |                                 | 20b | Methods for any additional analyses (eg, subgroup and adjusted analyses)                                                                                                                                                                                                                                                              | _____10_____    |
| 9  |                                 |     |                                                                                                                                                                                                                                                                                                                                       |                 |
| 10 |                                 | 20c | Definition of analysis population relating to protocol non-adherence (eg, as randomised analysis), and any statistical methods to handle missing data (eg, multiple imputation)                                                                                                                                                       | _____11_____    |
| 11 |                                 |     |                                                                                                                                                                                                                                                                                                                                       |                 |
| 12 |                                 |     |                                                                                                                                                                                                                                                                                                                                       |                 |
| 13 |                                 |     |                                                                                                                                                                                                                                                                                                                                       |                 |
| 14 | <b>Methods: Monitoring</b>      |     |                                                                                                                                                                                                                                                                                                                                       |                 |
| 15 |                                 |     |                                                                                                                                                                                                                                                                                                                                       |                 |
| 16 | Data monitoring                 | 21a | Composition of data monitoring committee (DMC); summary of its role and reporting structure; statement of whether it is independent from the sponsor and competing interests; and reference to where further details about its charter can be found, if not in the protocol. Alternatively, an explanation of why a DMC is not needed | _____8_____     |
| 17 |                                 |     |                                                                                                                                                                                                                                                                                                                                       |                 |
| 18 |                                 |     |                                                                                                                                                                                                                                                                                                                                       |                 |
| 19 |                                 |     |                                                                                                                                                                                                                                                                                                                                       |                 |
| 20 |                                 |     |                                                                                                                                                                                                                                                                                                                                       |                 |
| 21 |                                 |     |                                                                                                                                                                                                                                                                                                                                       |                 |
| 22 |                                 | 21b | Description of any interim analyses and stopping guidelines, including who will have access to these interim results and make the final decision to terminate the trial                                                                                                                                                               | _____N/A_____   |
| 23 |                                 |     |                                                                                                                                                                                                                                                                                                                                       |                 |
| 24 |                                 |     |                                                                                                                                                                                                                                                                                                                                       |                 |
| 25 | Harms                           | 22  | Plans for collecting, assessing, reporting, and managing solicited and spontaneously reported adverse events and other unintended effects of trial interventions or trial conduct                                                                                                                                                     | _____8_____     |
| 26 |                                 |     |                                                                                                                                                                                                                                                                                                                                       |                 |
| 27 |                                 |     |                                                                                                                                                                                                                                                                                                                                       |                 |
| 28 | Auditing                        | 23  | Frequency and procedures for auditing trial conduct, if any, and whether the process will be independent from investigators and the sponsor                                                                                                                                                                                           | _____8_____     |
| 29 |                                 |     |                                                                                                                                                                                                                                                                                                                                       |                 |
| 30 |                                 |     |                                                                                                                                                                                                                                                                                                                                       |                 |
| 31 |                                 |     |                                                                                                                                                                                                                                                                                                                                       |                 |
| 32 | <b>Ethics and dissemination</b> |     |                                                                                                                                                                                                                                                                                                                                       |                 |
| 33 |                                 |     |                                                                                                                                                                                                                                                                                                                                       |                 |
| 34 | Research ethics approval        | 24  | Plans for seeking research ethics committee/institutional review board (REC/IRB) approval                                                                                                                                                                                                                                             | _____5, 11_____ |
| 35 |                                 |     |                                                                                                                                                                                                                                                                                                                                       |                 |
| 36 |                                 |     |                                                                                                                                                                                                                                                                                                                                       |                 |
| 37 | Protocol amendments             | 25  | Plans for communicating important protocol modifications (eg, changes to eligibility criteria, outcomes, analyses) to relevant parties (eg, investigators, REC/IRBs, trial participants, trial registries, journals, regulators)                                                                                                      | _____N/A_____   |
| 38 |                                 |     |                                                                                                                                                                                                                                                                                                                                       |                 |
| 39 |                                 |     |                                                                                                                                                                                                                                                                                                                                       |                 |
| 40 |                                 |     |                                                                                                                                                                                                                                                                                                                                       |                 |
| 41 |                                 |     |                                                                                                                                                                                                                                                                                                                                       |                 |
| 42 |                                 |     |                                                                                                                                                                                                                                                                                                                                       |                 |
| 43 |                                 |     |                                                                                                                                                                                                                                                                                                                                       |                 |
| 44 |                                 |     |                                                                                                                                                                                                                                                                                                                                       |                 |
| 45 |                                 |     |                                                                                                                                                                                                                                                                                                                                       |                 |
| 46 |                                 |     |                                                                                                                                                                                                                                                                                                                                       |                 |

|    |                               |     |                                                                                                                                                                                                                                                                                     |               |
|----|-------------------------------|-----|-------------------------------------------------------------------------------------------------------------------------------------------------------------------------------------------------------------------------------------------------------------------------------------|---------------|
| 1  | Consent or assent             | 26a | Who will obtain informed consent or assent from potential trial participants or authorised surrogates, and how (see Item 32)                                                                                                                                                        | _____4_____   |
| 2  |                               |     |                                                                                                                                                                                                                                                                                     |               |
| 3  |                               |     |                                                                                                                                                                                                                                                                                     |               |
| 4  |                               | 26b | Additional consent provisions for collection and use of participant data and biological specimens in ancillary studies, if applicable                                                                                                                                               | _____N/A_____ |
| 5  |                               |     |                                                                                                                                                                                                                                                                                     |               |
| 6  |                               |     |                                                                                                                                                                                                                                                                                     |               |
| 7  | Confidentiality               | 27  | How personal information about potential and enrolled participants will be collected, shared, and maintained in order to protect confidentiality before, during, and after the trial                                                                                                | _____8_____   |
| 8  |                               |     |                                                                                                                                                                                                                                                                                     |               |
| 9  |                               |     |                                                                                                                                                                                                                                                                                     |               |
| 10 | Declaration of interests      | 28  | Financial and other competing interests for principal investigators for the overall trial and each study site                                                                                                                                                                       | _____13_____  |
| 11 |                               |     |                                                                                                                                                                                                                                                                                     |               |
| 12 |                               |     |                                                                                                                                                                                                                                                                                     |               |
| 13 | Access to data                | 29  | Statement of who will have access to the final trial dataset, and disclosure of contractual agreements that limit such access for investigators                                                                                                                                     | _____13_____  |
| 14 |                               |     |                                                                                                                                                                                                                                                                                     |               |
| 15 |                               |     |                                                                                                                                                                                                                                                                                     |               |
| 16 | Ancillary and post-trial care | 30  | Provisions, if any, for ancillary and post-trial care, and for compensation to those who suffer harm from trial participation                                                                                                                                                       | _____N/A_____ |
| 17 |                               |     |                                                                                                                                                                                                                                                                                     |               |
| 18 |                               |     |                                                                                                                                                                                                                                                                                     |               |
| 19 |                               |     |                                                                                                                                                                                                                                                                                     |               |
| 20 | Dissemination policy          | 31a | Plans for investigators and sponsor to communicate trial results to participants, healthcare professionals, the public, and other relevant groups (eg, via publication, reporting in results databases, or other data sharing arrangements), including any publication restrictions | _____11_____  |
| 21 |                               |     |                                                                                                                                                                                                                                                                                     |               |
| 22 |                               |     |                                                                                                                                                                                                                                                                                     |               |
| 23 |                               |     |                                                                                                                                                                                                                                                                                     |               |
| 24 |                               | 31b | Authorship eligibility guidelines and any intended use of professional writers                                                                                                                                                                                                      | _____11_____  |
| 25 |                               |     |                                                                                                                                                                                                                                                                                     |               |
| 26 |                               | 31c | Plans, if any, for granting public access to the full protocol, participant-level dataset, and statistical code                                                                                                                                                                     | _____N/A_____ |
| 27 |                               |     |                                                                                                                                                                                                                                                                                     |               |
| 28 |                               |     |                                                                                                                                                                                                                                                                                     |               |
| 29 | <b>Appendices</b>             |     |                                                                                                                                                                                                                                                                                     |               |
| 30 |                               |     |                                                                                                                                                                                                                                                                                     |               |
| 31 | Informed consent materials    | 32  | Model consent form and other related documentation given to participants and authorised surrogates                                                                                                                                                                                  | _____N/A_____ |
| 32 |                               |     |                                                                                                                                                                                                                                                                                     |               |
| 33 |                               |     |                                                                                                                                                                                                                                                                                     |               |
| 34 | Biological specimens          | 33  | Plans for collection, laboratory evaluation, and storage of biological specimens for genetic or molecular analysis in the current trial and for future use in ancillary studies, if applicable                                                                                      | _____N/A_____ |
| 35 |                               |     |                                                                                                                                                                                                                                                                                     |               |
| 36 |                               |     |                                                                                                                                                                                                                                                                                     |               |

37  
38 \*It is strongly recommended that this checklist be read in conjunction with the SPIRIT 2013 Explanation & Elaboration for important clarification on the items.  
39 Amendments to the protocol should be tracked and dated. The SPIRIT checklist is copyrighted by the SPIRIT Group under the Creative Commons  
40 "[Attribution-NonCommercial-NoDerivs 3.0 Unported](https://creativecommons.org/licenses/by-nc-nd/3.0/)" license.  
41  
42

# BMJ Open

## Ankle Trial study protocol: a randomised trial comparing pain profiles after peripheral nerve block or spinal anaesthesia for ankle fracture surgery

|                                 |                                                                                                                                              |
|---------------------------------|----------------------------------------------------------------------------------------------------------------------------------------------|
| Journal:                        | <i>BMJ Open</i>                                                                                                                              |
| Manuscript ID                   | bmjopen-2017-016001.R1                                                                                                                       |
| Article Type:                   | Protocol                                                                                                                                     |
| Date Submitted by the Author:   | 31-Mar-2017                                                                                                                                  |
| Complete List of Authors:       | Sort, Rune; Herlev Hospital, Dept. of Anaesthesiology<br>Brorson, Stig; Herlev Hospital<br>Gögenür, Ismail<br>Møller, Ann; Herlev Hospital   |
| <b>Primary Subject Heading</b>: | Anaesthesia                                                                                                                                  |
| Secondary Subject Heading:      | Surgery, Patient-centred medicine                                                                                                            |
| Keywords:                       | Anaesthesia in orthopaedics < ANAESTHETICS, Pain management < ANAESTHETICS, Adult anaesthesia < ANAESTHETICS, Clinical trials < THERAPEUTICS |
|                                 |                                                                                                                                              |

SCHOLARONE™  
Manuscripts

## Title

**AnAnkle Trial study protocol: a randomised trial comparing pain profiles after peripheral nerve block or spinal anaesthesia for ankle fracture surgery.**

Rune Sort<sup>1</sup>, Stig Brorson<sup>2</sup>, Ismail Gögenur<sup>3</sup>, Ann Merete Møller<sup>1</sup>

<sup>1</sup>Department of Anaesthesiology, Herlev and Gentofte University Hospital, Denmark.

<sup>2</sup>Department of Orthopaedic Surgery, Herlev and Gentofte University Hospital, Denmark.

<sup>3</sup>Department of Surgery, Centre for Surgical Science, Zealand University Hospital, Denmark.

### Corresponding Author:

Rune Sort

Department of Anaesthesiology I65N9

Herlev and Gentofte University Hospital

Herlev Ringvej 75

2730 Herlev, Denmark

[sort@dadlnet.dk](mailto:sort@dadlnet.dk)

Tel: +45 38 68 60 30

**Keywords:** Peripheral nerve block, regional anaesthesia, ankle fracture, postoperative pain, rebound pain

**Word count:** 3930 words



## Abstract

**Introduction:** Ankle fracture surgery is a common procedure but the influence of anaesthesia choice on postoperative pain and quality of recovery is poorly understood. Some authors suggest a benefit of peripheral nerve block (PNB) in elective procedures, but the different pain profile following acute fracture surgery and rebound pain upon cessation of the PNB remain unexplored. We present an ongoing randomised study aiming to compare primary PNB anaesthesia with spinal anaesthesia for ankle fracture surgery regarding postoperative pain profiles and quality of recovery.

**Methods and analysis:** AnAnkle Trial is a randomised, dual centre, open label, blinded analysis trial of 150 adult patients undergoing primary internal fixation of an ankle fracture. Main exclusion criteria are habitual opioid use, impaired pain sensation, other painful injuries or cognitive impairment. The intervention is ultrasound guided popliteal sciatic (20 ml) and saphenal nerve (8 ml) PNB with ropivacaine 7.5 mg/ml and controls receive spinal anaesthesia (2 ml) with hyperbaric bupivacaine 5 mg/ml. Postoperatively all receive paracetamol, ibuprofen and patient controlled i.v. morphine on demand. Morphine consumption and pain scores are registered in the first 27 hours and reported as an integrated pain score (IPS) as the primary endpoint. Pain score intervals are three hours and we will use the area under curve to get a longitudinal measure of pain. Secondary outcomes include rebound pain upon cessation of anaesthesia, opioid side effects (opioid related symptom distress score, OR-SDS), quality of recovery (QoR-15 score) and pain scores and medication day 1-7 (diary).

**Ethics and dissemination:** The study has been approved by the Regional Ethics Committees in the Capital Region of Denmark, the Danish Data Protection Agency and the Danish Health and Medical Authority. We will publish the results in international peer-reviewed medical journals.

**Registration details:** AnAnkle Trial is registered in The European Clinical Trials Database (EudraCT 2015-001108-76).

## Strengths and limitations of this study

- This is the first trial to thoroughly investigate the postoperative pain profile and directly compare the most commonly used regional anaesthesia techniques for ankle fracture surgery.
- The trial is randomised and designed with attention to allocation concealment and stratification to prevent selection bias.
- The primary endpoint is a composite measure of pain and morphine consumption, which holds more statistical power than when analysing either of the two components alone.
- Blinding of participants and investigators is not feasible, thus the trial is open labelled with blinded data analysis.

## Introduction

Peripheral nerve blocks (PNB) are getting increasingly popular for both primary anaesthesia and postoperative pain control in orthopaedic limb surgery, but its suitability for acute fracture surgery is not well established.

Ankle fracture is a common acute condition, which often requires surgery.[1,2] There is no evidence based consensus regarding the best choice of anaesthesia modality for this high volume procedure and the influence of this choice on the postoperative pain profile is poorly understood. Spinal anaesthesia (SA) is most common, but PNBs are becoming widely implemented, as they provide long lasting pain control and are regarded very safe.[3–7] There is some evidence that PNBs used in elective surgical procedures on knee, ankle and foot are effective in reducing pain, opioid consumption, and related side effects such as nausea and vomiting, as well as potentially reducing length of hospital stay and increasing patient satisfaction.[4,8–16] However, PNBs can represent a logistical challenge in the acute setting and, moreover, the pain profile following fractures and fracture surgery is naturally different from that of conditions requiring elective surgery.

Very few studies have investigated the efficacy and possible benefits of PNBs in this context and results are incongruous. One randomised study of postoperative pain scores in ankle fracture surgery showed initial benefit with PNB added to general anaesthesia but also revealed a sizeable “rebound pain” upon cessation of the PNBs, which could challenge the overall benefit on the postoperative pain profile.[17] Another randomised study of bimalleolar fracture surgery patients showed a longer postoperative effect of PNB anaesthesia compared with SA measured as time to first analgesic request, but pain levels were not measured.[18] At our centre, a large retrospective study of postoperative opioid consumption in ankle fracture surgery has suggested that the largest benefit of the regional anaesthesia modalities is obtained with PNBs.[19] However, in a prospective exploratory pilot study investigating primary PNB anaesthesia for ankle fracture surgery we also found a clear indication of rebound pain in relation to cessation of the PNB effect, especially in younger individuals (abstract published).[20]

We hypothesise that:

- A. PNB anaesthesia for ankle fracture surgery reduces overall postoperative pain, opioid use and opioid related side-effects compared to SA.
- B. Rebound pain following cessation of PNB anaesthesia is more pronounced than rebound pain following cessation of SA after ankle fracture surgery.
- C. Patient experienced quality of recovery after ankle fracture surgery is better following PNB anaesthesia than following SA.

We therefore aim to assess the postoperative pain profile and quality of recovery after acute ankle fracture surgery in a randomised setting comparing primary PNB anaesthesia with SA.

## Methods and analysis

### *Trial design*

AnAnkle Trial is a prospective, randomised, parallel group, dual centre, open label, blinded analysis trial designed to assess the postoperative pain profile and quality of recovery following ankle fracture surgery under peripheral nerve block anaesthesia compared with spinal anaesthesia. The study is conducted in two university hospitals in the Capital Region of Denmark. Trial participants are randomly assigned to either SA or PNB anaesthesia as described below. Primary data are patient reported pain scores and on demand morphine consumption reported as an integrated pain score (IPS).

### *Participant eligibility and consent:*

Treating physicians consecutively identify eligible subjects according to the listed criteria. Eligible subjects receive written and oral information and are included after anaesthesiologist investigators have obtained informed written consent.

Inclusion criteria:

1. Scheduled for internal fixation of an ankle fracture
2. Age  $\geq$  18 years
3. Ability to read and understand Danish and give informed written consent

Exclusion criteria:

1. Allergy towards NSAID, paracetamol, morphine or local anaesthetics
2. Bodyweight < 52 kg; to avoid toxic doses of local anaesthetics
3. Contraindications for SA
4. Current gastro-intestinal bleeding
5. Proximal fibular fracture or multitrauma / other simultaneous fractures
6. Cognitive or psychiatric dysfunction or alcohol/narcotic substance abuse causing expected inability to comply with study protocol
7. No available anaesthesiologist with PNB capability at scheduled time of operation
8. Neuropathy / neurological dysfunction in the lower extremities
9. Habitual daily use of opioids
10. Pregnancy or breastfeeding
11. Infection at anaesthesia injection site

1  
2 12. Nephropathy requiring dialysis

3  
4 13. Acute porphyria

### 5 6 *Recruitment period*

7  
8 All legislative and ethical approvals were obtained and the trial registered in The European Clinical Trials  
9 Database (EudraCT 2015-001108-76) by June 2015.[21,22] Inclusion was initiated in July 2015 and will  
10 continue until 150 patients have been included and their primary outcome data secured in an expected  
11 inclusion period of 22-24 months.  
12

### 13 14 *Sample size estimation*

15  
16 The target sample size for AnAnkle Trial is 150 participants. This estimation for the primary outcome (IPS) is  
17 based on the O'Brien Castello formula by calculating Wilcoxon-Mann-Whitney odds (WMW odds) for  
18 sample sizing in non-parametric statistics.[23,24] Prior studies have shown a positive correlation between  
19 the two parameters on which the IPS is based, i.e. higher pain scores are associated with a higher opioid  
20 consumption and vice versa.[23] Using data from our observational study we designed the trial to be able  
21 to detect a simultaneous 30 % difference in both morphine consumption and pain scores as we consider  
22 this a clinically meaningful difference. We did not plan any interim analyses.  
23  
24

25  
26 This results in WMW odds = 1.75. With a power of 80 % ( $\beta = 20\%$ ) and two sided significance level  $\alpha = 5\%$   
27 the resulting sample size is 141 patients. Adding 6 % to adjust for protocol violations results in a final  
28 sample size of 150 (2 x 75) patients to include.  
29

30  
31 We also conducted sample size estimations for the following key secondary outcomes, which were all  
32 found to be covered by the set sample size to include: rebound NRS-AUC for 6 hrs. with 50 % intergroup  
33 difference, rebound IPS 6 hrs. 30 % difference, NRS-AUC 0-27 hrs. 30 % difference, morphine consumption  
34 0-27 hrs. 30 % difference, and quality of recovery score 10 % difference. All outcomes are listed below.  
35

### 36 37 *Randomisation and allocation concealment*

38  
39 Randomisation is externally managed, computer generated and irreversible. The allocation and participant  
40 trial identification number is retrieved via a secured website with an allocation ratio of 1:1 between PNB  
41 and spinal anaesthesia. The sequence is stratified by trial centre and patient age group ( $\leq$  or  $>$  60 years of  
42 age) and performed as block randomisation with variable block sizes that are unknown to the investigators  
43 to maintain allocation concealment. We thereby follow the ICH Harmonised Tripartite Guideline for Good  
44 Clinical Practice (GCP) and minimise possible bias from uneven inclusion between centres and age groups  
45 with potentially different pain profiles.  
46  
47  
48  
49  
50  
51  
52  
53  
54  
55  
56  
57  
58  
59  
60

### *Blinding*

The trial is open labelled. Thus, investigators and participants are not blinded, but data will be blinded by an independent consultant before analysis.

The difference in anaesthesia application between the groups (spinal in the lower back and PNB at lower thigh level) combined with the characteristic differences in onset and duration of anaesthesia makes blinding of both participants and physicians administering the anaesthesia effectively impossible. PNBs must be administered well before the surgery to ensure sufficient onset time whereas SA is best administered shortly before surgery to ensure adequate duration. A clear difference in duration of the anaesthesia effect between groups is expected which renders blinding of data collectors ineffective. Data for the main outcomes are registered directly by the participants (pain scores) or electronically (morphine PCA pump). Patients do not need to consult with staff to take morphine. The collected data will be anonymised and blinded by an external consultant, not otherwise involved in the trial, before statistical analysis is performed.

### *Interventions*

Intervention group: PNB as ultrasound guided popliteal sciatic nerve block and mid-femoral saphenal nerve block with ropivacaine hydrochloride 7.5 mg/ml. We use a fixed dose of 20 ml (150 mg) for the sciatic nerve and 8 ml (60 mg) for the saphenal nerve to minimise the risk of toxic reactions. Unsuccessful block of a single nerve (tibial, peroneal or saphenal), defined as no effect on sensory function after 40-45 minutes or insufficient effect after 60 minutes, is supplemented with an additional dose of 5 ml or 10 ml provided the patient is weighing 62-71 kg or  $\geq 72$  kg respectively, thus staying within recommended total dosage of 4 mg/kg of ropivacaine.

Control group: standard SA using hyperbaric bupivacaine 5 mg/ml, 2.0 ml.

Both groups: small doses of midazolam, propofol or similar can be offered on demand during administration of spinal or PNB anaesthesia to help remedy any anxiety. Both groups will be offered light to moderate sedation during the operation with propofol i.v. If necessary, i.v. boluses of short action opioid such as fentanyl or sufentanil can be administered.

Standard postoperative pain medication regimen: tablet paracetamol 1000 mg x 4, tablet ibuprofen 400 mg x 3 and i.v. morphine via a patient controlled analgesia (PCA) pump system delivering 2.5 mg of morphine on demand with a 6 minute lock out period. The morphine is changed to tablets 5-10 mg on demand after 27 hours.

## Outcomes:

### Primary outcome measure:

- Integrated Pain Score (IPS) for the period 0-27 hours post-anaesthesia. IPS is based on Numeric Rating Scale pain score Area Under the Curve (NRS-AUC) and total morphine consumption. NRS pain score is registered every three hours.

The 27-hour primary study period was defined from experiences gained in the observational pilot study to ensure that we capture the full period of potential rebound pain in both groups. The PNBs lasted a mean of 16.5 hours and rebound pain stabilised and subsided within a maximum of about 6 hours. We chose time of anaesthesia as starting point rather than time of surgery because logistical challenges can result in fairly large variations in time from PNB administration to surgery.

### Secondary outcome measures:

- Rebound pain: IPS for a 6-hour period from patient-reported time of cessation of the sensory block (PNB or spinal) in the ankle.
- NRS-AUC pain 0-27 hours post-anaesthesia.
- Morphine use 0-27 hours (PCA pump)
- Opioid adverse effects 0-27 hours = Clinically Meaningful Events (CME) assessed with the composite Opioid-Related Symptom Distress Scale (OR-SDS)[25,26]
- Quality of Recovery (Danish QoR-15 score)[27] 0-27 hours
- "Risk patients" i.e. number of patients with IPS +100 to +200 (= high pain *and* high morphine consumption)
- Peak NRS pain score 0-27 hours
- "High pain patients" i.e. number of patients reaching peak NRS  $\geq 7$

### Tertiary outcome measures:

- NRS pain scores postoperative (PO) days 1-7
- Need for on demand opioids PO day 2-7
- Opioid adverse effects PO day 2 = CMEs assessed by the composite OR-SDS score
- Overall patient satisfaction with anaesthesia form including postoperative pain control, NRS-score
- Adverse events / adverse reactions

- Postoperative nerve related symptoms (PONS) on PO day 7

The OR-SDS questionnaire has been validated in English.[25,26,28] We conducted a Danish translation for AnAnkle Trial using two independent medical doctors, bi-lingual in English and Danish. Disagreements were discussed with the principal investigator and minor adjustments were made in a second round after testing the translated version on 8 patients.

### *Data management, audit and safety*

Only data necessary for evaluation of the stated outcomes, safety parameters and possible confounders are collected and only after inclusion and randomisation upon retrieving informed written consent.

For every included patient a Case Report Form (CRF) is devised for registration of all data except morphine use, which is electronically registered by the PCA pump and saved as patient specific files. Data sources include patient reported pain scores, questionnaires and diary, electronic patient files and the PCA morphine data files. The NRS pain scores are registered directly by the patients on paper. They also note the time of return of sensation to the ankle.

All data are marked and handled according to GCP standards and legislative permission by the Danish Data Protection Agency.

### **Safety:**

Any adverse events or reactions (AEs) within five half-lives of the intervention drugs are registered and classified using the Common Terminology Criteria for Adverse Events (CTCAE)[29]. All severe AEs (SAEs) are reported to the responsible trial sponsor and followed until stable or resolved. If an SAE meets criteria for reporting it is forwarded immediately to the Danish Medicines Agency and the Ethics Committee.

The trial will be stopped in its entirety in the unlikely event that incidence and severity of adverse events compromise the safety of trial participants as evaluated by the trial group or by the Danish Medicines Agency.

AnAnkle Trial is monitored by the independent GCP unit at Copenhagen University Hospital through regular auditing visits to both trial centres, thus ensuring adherence to GCP guidelines as well as proper handling and reporting of AEs.

### *Protocol violations and participant withdrawal*

#### **Protocol violations:**

- Failed spinal or PNB (defined as change of anaesthesia modality necessary)
- Glucocorticoids or controlled-release opioids administered on the day of surgery

Participants meeting any one of these criteria will not be excluded and data are collected as planned. Data will be included in an intention-to-treat (ITT) analysis but omitted in per-protocol analyses.

#### **Participant withdrawal:**

Participants can be withdrawn / excluded after randomisation if:

- Surgery is cancelled after administration of anaesthesia. The patient can be re-included later if possible.
- Surgery is rescheduled or changed after randomisation and eligibility is no longer upheld according to the in- and exclusion criteria.
- Postoperative complications make the patient unable to comply with study protocol for obtaining primary data (pain scores and PCA-morphine data for 27 hours).
- Withdrawal of consent, before all primary data are obtained (pain scores and PCA-morphine data for 27 hours).

Participants meeting any of these criteria can be excluded from the trial after randomisation. No data will be analysed and they will be replaced by additional inclusion until the calculated sample size is included for ITT analysis. For safety reasons adverse events will be registered for any excluded patients who have received the intervention (anaesthesia). An overview is shown in the flow diagram (figure).

Withdrawal of consent or failure to comply with the protocol after 27 hours postoperatively will not lead to exclusion from analysis of already collected data.

#### ***Statistical plan***

##### **Primary outcome analysis:**

Pain scores and morphine data cannot be expected to follow normal distribution and we expect to handle the primary outcome using non-parametric statistics. The Integrated Pain Score has been validated statistically with this in mind.[23] It is derived from pain scores (NRS-AUC in our trial) and total morphine consumption. Both measures are ranked across both trial groups and the IPS is calculated as deviation from mean rank in pain score added to deviation from mean rank in morphine giving a result for each trial participant between -200 % and +200 %. The groups can be compared for significant difference with a distribution-independent permutation test and/or Mann-Whitney test and effect size can be expressed by Ratio of Mean Rank (RoMR) or WMW-odds.[23]



1  
2 Analysis of the primary outcome will be performed as “intention-to-treat” analysis including all consenting  
3 randomised patients not meeting the defined withdrawal criteria. Additional “per-protocol” analyses will  
4 be performed and include only participants who follow the protocol without the defined protocol  
5 violations.  
6  
7

8  
9 Two-sided p-values < 0.05 will be considered statistically significant.  
10

#### 11 **Secondary outcome analyses:**

12  
13 Again, we expect to handle most outcomes using non-parametrical statistics. However, some results such  
14 as NRS-AUC measures may prove to resemble a normal distribution which, taken together with the fairly  
15 large sample size, warrants the use of parametrical tests in order to obtain confidence intervals on these  
16 estimates. In parametric models, we may include adjustment for expected heavy confounders, i.e. age,  
17 diabetes and fracture severity (uni-, bi- or trimalleolar), as this can increase the accuracy of the estimate,  
18 even though the groups are expected to be comparable due to randomisation.  
19  
20

#### 21 **Subgroup analyses:**

22  
23 Pain experience is known to vary with age and possibly gender.[30] We have stratified randomisation in  
24 two age groups ( $\leq$  or  $>$  60 years of age) and will perform subgroup analysis on relevant outcomes according  
25 to age group and gender.  
26  
27

#### 28 **Accountability procedure for missing data for analysis:**

29  
30 Data for the primary outcome are registered from 0-27 hours from time of anaesthesia. Missing data after  
31 this time (till end of participation on postoperative day 7) will not be replaced.  
32  
33

34  
35 Some missing data are expected in the patient reported NRS pain scores from 0-27 hours. Pragmatically we  
36 will fill in a missing measure point with the average of the two adjacent points, in effect drawing a line  
37 between them (linear interpolation), and thus allowing for AUC to be calculated. If the missing point is the  
38 last one (at 27 hours) the value of the last observation is carried forward. If more than two 0-27 hours NRS  
39 scores are missing, the patient will be excluded from per protocol analyses.  
40  
41

42  
43 The measuring of rebound pain is performed over a period of 6 hours following patient evaluated cessation  
44 of the sensory block. Should this period extend beyond the 27-hour-period we will carry forward the last  
45 observation to extrapolate data. As the mean effect duration of the PNBs in our observational study was  
46 around 16 hours we do not expect that extrapolation will be necessary. When appropriate, we will perform  
47 sensitivity analyses to evaluate the impact of data extrapolation.  
48  
49  
50  
51  
52  
53  
54  
55  
56  
57  
58  
59  
60

## Ethics and dissemination

### *Ethical and legislative approvals*

AnAnkle Trial is conducted in accordance with applicable regulatory requirements and the study protocol, which is approved by the Regional Ethics Committees in the Capital Region of Denmark, the Danish Data Protection Agency and the Danish Health and Medical Authority. We follow national and international standards for good clinical practice (ICH GCP guidelines) and the recommendations of the CONSORT Statement and extension in reporting randomised clinical pragmatic trials.[31] The protocol was drafted following the SPIRIT guidelines accordingly.[32] The project is monitored by the Copenhagen GCP unit.

### *Publication plan*

We strive to readily publish the results in international peer-reviewed journals and all results will be made public, regardless of whether they come out positive, negative or inconclusive. Due to the complexity of the pain profiles, we intend to publish the results in at least two independent articles with focus on the primary outcome measure and the secondary measure of rebound pain respectively.

All authors must fulfil the criteria of the Vancouver convention.

## Discussion

Regional anaesthesia is often preferred in ankle fracture surgery due to the superior safety profile and probably better postoperative pain control compared with general anaesthesia.[17,19,33] To the best of our knowledge, AnAnkle Trial is the first study to thoroughly investigate the postoperative pain profile and test which one of the most frequently used regional anaesthesia techniques is superior. Postoperative pain studies are often limited by large time intervals between pain registrations. We designed our trial to avoid this issue since it renders evaluation of the clinical significance of rebound pain impossible, because the rebound could be very intense yet completely undetected in-between pain scorings.

AnAnkle Trial constitutes a scientifically strong setup although blinding of the participants and investigators is not practically possible which holds a potential risk of bias; e.g. reported pain scores might be affected by psychological factors influenced by information from the investigators. To minimise this influence, all pain scores used for the primary outcome are registered by the participants, without consulting the staff.

Likewise, the morphine data are gathered electronically from the PCA pump, which the patient activates without consulting the staff, thus ensuring a minimal risk of related bias. Finally, data analysis will be blinded. As in most other clinical trials, there remains a risk of sampling bias due to the eligibility criteria, which might impair the overall generalisability of our results.

1  
2 Among the strengths of the design are randomisation and attention to sequence generation and allocation  
3 concealment to prevent selection bias between the two groups. The block randomisation and stratification  
4 protect against bias from variability of practice during a relatively long inclusion period on different centres.  
5 We have chosen a composite score of pain assessment and opioid consumption as primary outcome. The  
6 IPS has been thoroughly tested and proven to hold more statistical power than conventional comparisons  
7 of pain scores or morphine alone.[23] There is a natural correlation between the two that can lead to  
8 failure in identifying a true effect, or even lead to finding a false positive effect, on either outcome, when  
9 not balanced by evaluation of the other. In this study we will use the IPS with a longitudinal pain  
10 measurement in the form of AUC pain score rather than a single pain rating. This allows us to illustrate the  
11 pain profile over time without letting the results be compromised by statistical mass significance. The  
12 individual components of the IPS are separately analysed among various secondary endpoints to provide  
13 supplementary details to the composite primary endpoint, as is recommended in the IMMPACT consensus  
14 on pain trials.[34]

15  
16 If AnAnkle Trial yields clear results the implications on clinical practice could be profound. Fracture surgery  
17 is very common and optimising the choice of anaesthesia will have a major influence on the postoperative  
18 recovery and the overall patient course for a very large group of patients.  
19  
20  
21  
22  
23

### 24 **Authors' contributions**

25 Rune Sort: Idea development, study planning, writing first draft, revisions, approving final protocol,  
26 registering and obtaining legislative and ethical approvals.

27 Stig Brorson: Idea development, study planning, draft revisions, approving final protocol.

28 Ismail Gögenur: Idea development, study planning, draft revisions, approving final protocol.

29 Ann Merete Møller: Idea development, study planning, draft revisions, approving final protocol.  
30  
31

### 32 **Funding statement**

33 This study is supported by the non-profit Danish Society of Anaesthesia and Intensive care Medicine  
34 "DASAIMs Forskningsinitiativ", the private non-profit foundation "Viggo og Krista Pedersens Fond" and by  
35 the public source "Forskningsrådet Herlev Hospital". The first author is the sponsor; the funders have no  
36 role in design, conduction or analysis of this trial.  
37  
38  
39  
40  
41  
42  
43  
44

### 45 **Competing interests statement**

46  
47  
48  
49  
50  
51  
52  
53  
54  
55  
56  
57  
58  
59  
60

1  
2 None to declare.  
3  
4  
5  
6

## 7 **Acknowledgements**

8  
9 We would like to thank Jesper Kent Nielsen, M.D., Consultant Anaesthetist, Herlev and Gentofte University  
10 Hospital, Herlev, Denmark and Nicolai Bang Foss, M.D., DMSc, Consultant Anaesthetist, Hvidovre and  
11 Amager Hospital, Hvidovre, Denmark for valuable input during idea development and drafting of the  
12 protocol. We thank biostatistician Tobias Wirenfeldt Klausen, MSc, Dept. of Haematology, Herlev and  
13 Gentofte Hospital, Herlev, Denmark for statistical assistance and we thank OPEN, Odense Patient data  
14 Explorative Network, Odense University Hospital, Odense, Denmark for the secure online randomisation  
15 solution.  
16  
17  
18  
19  
20  
21  
22

## 23 **Data sharing**

24 This is a study protocol so there are no data yet. The trial registration is freely accessible in The European  
25 Clinical Trials Database (EudraCT 2015-001108-76).  
26  
27  
28  
29  
30  
31

## 32 **Figure Legends**

33 Figure 1: AnAnkle Trial Flow Diagram  
34  
35  
36  
37  
38  
39

## 40 **References**

- 41 1 Daly PJ, Fitzgerald RH, Melton LJ, *et al.* Epidemiology of ankle fractures in Rochester, Minnesota.  
42 *Acta Orthop Scand* 1987;**58**:539–44.
- 43 2 Court-Brown CM, McBirnie J, Wilson G. Adult ankle fractures--an increasing problem? *Acta Orthop*  
44 *Scand* 1998;**69**:43–7.
- 45 3 Watts SA, Sharma DJ. Long-term neurological complications associated with surgery and peripheral  
46 nerve blockade: outcomes after 1065 consecutive blocks. *Anaesth Intensive Care* 2007;**35**:24–31.
- 47 4 Klein SM, Nielsen KC, Greengrass RA, *et al.* Ambulatory discharge after long-acting peripheral nerve  
48 blockade: 2382 blocks with ropivacaine. *Anesth Analg* 2002;**94**:65–70.
- 49 5 Jeng CL, Torrillo TM, Rosenblatt MA. Complications of peripheral nerve blocks. *Br J Anaesth*  
50 2010;**105 Suppl**:i97-107. doi:10.1093/bja/aeq273
- 51 6 Capdevila X, Pirat P, Bringuier S, *et al.* Continuous peripheral nerve blocks in hospital wards after  
52 orthopedic surgery: a multicenter prospective analysis of the quality of postoperative analgesia and  
53  
54  
55  
56  
57  
58  
59  
60

- 1  
2 complications in 1,416 patients. *Anesthesiology* 2005;**103**:1035–45.
- 3  
4  
5 7 Sites BD, Taenzer AH, Herrick MD, *et al.* Incidence of local anesthetic systemic toxicity and  
6 postoperative neurologic symptoms associated with 12,668 ultrasound-guided nerve blocks: an  
7 analysis from a prospective clinical registry. *Reg Anesth Pain Med* 2012;**37**:478–82.  
8 doi:10.1097/AAP.0b013e31825cb3d6
- 9  
10 8 Capdevila X, Barthelet Y, Biboulet P, *et al.* Effects of perioperative analgesic technique on the  
11 surgical outcome and duration of rehabilitation after major knee surgery. *Anesthesiology* 1999;**91**:8–  
12 15.
- 13  
14 9 Elliot R, Pearce CJ, Seifert C, *et al.* Continuous infusion versus single bolus popliteal block following  
15 major ankle and hindfoot surgery: a prospective, randomized trial. *Foot Ankle Int* 2010;**31**:1043–7.  
16 doi:10.3113/FAI.2010.1043
- 17  
18 10 White PF, Issioui T, Skrivaneck GD, *et al.* The use of a continuous popliteal sciatic nerve block after  
19 surgery involving the foot and ankle: does it improve the quality of recovery? *Anesth Analg*  
20 2003;**97**:1303–9.
- 21  
22 11 Liu SS, Strodtbeck WM, Richman JM, *et al.* A comparison of regional versus general anesthesia for  
23 ambulatory anesthesia: a meta-analysis of randomized controlled trials. *Anesth Analg*  
24 2005;**101**:1634–42. doi:10.1213/01.ANE.0000180829.70036.4F
- 25  
26 12 Grosser DM, Herr MJ, Claridge RJ, *et al.* Preoperative lateral popliteal nerve block for intraoperative  
27 and postoperative pain control in elective foot and ankle surgery: a prospective analysis. *Foot Ankle*  
28 *Int* 2007;**28**:1271–5. doi:10.3113/FAI.2007.1271
- 29  
30 13 Xu J, Chen X, Ma C, *et al.* Peripheral nerve blocks for postoperative pain after major knee surgery. In:  
31 Wang X, ed. *Cochrane Database of Systematic Reviews*. Chichester, UK: : John Wiley & Sons, Ltd  
32 2014. CD010937. doi:10.1002/14651858.CD010937.pub2
- 33  
34 14 Chan E-Y, Fransen M, Parker DA, *et al.* Femoral nerve blocks for acute postoperative pain after knee  
35 replacement surgery. In: Chan E-Y, ed. *Cochrane Database of Systematic Reviews*. Chichester, UK: :  
36 John Wiley & Sons, Ltd 2014. CD009941. doi:10.1002/14651858.CD009941.pub2
- 37  
38 15 Casati A, Cappelleri G, Berti M, *et al.* Randomized comparison of remifentanyl-propofol with a sciatic-  
39 femoral nerve block for out-patient knee arthroscopy. *Eur J Anaesthesiol* 2002;**19**:109–14.
- 40  
41 16 Jankowski CJ, Hebl JR, Stuart MJ, *et al.* A comparison of psoas compartment block and spinal and  
42 general anesthesia for outpatient knee arthroscopy. *Anesth Analg* 2003;**97**:1003–9, table of  
43 contents.
- 44  
45 17 Goldstein RY, Montero N, Jain SK, *et al.* Efficacy of popliteal block in postoperative pain control after  
46 ankle fracture fixation: a prospective randomized study. *J Orthop Trauma* 2012;**26**:557–61.  
47 doi:10.1097/BOT.0b013e3182638b25
- 48  
49 18 Protić A, Horvat M, Komen-Usljebrka H, *et al.* Benefit of the minimal invasive ultrasound-guided  
50 single shot femoro-popliteal block for ankle surgery in comparison with spinal anesthesia. *Wien Klin*  
51 *Wochenschr* 2010;**122**:584–7. doi:10.1007/s00508-010-1451-9
- 52  
53 19 Christensen KP, Møller AM, Nielsen JK, *et al.* The Effects of Anesthetic Technique on Postoperative  
54 Opioid Consumption in Ankle Fracture Surgery. *Clin J Pain* 2016;**32**:870–4.  
55 doi:10.1097/AJP.0000000000000335
- 56  
57 20 Sort R, Brorson S, Gögenur I, *et al.* Peripheral nerve block in primary ankle fracture surgery -  
58  
59  
60

- 1  
2 exploring rebound pain. *Eur J Anaesthesiol* 2015;**32**:88.  
3  
4 21 The European Medicines Agency. EudraCT public website. EMA. <https://eudract.ema.europa.eu/>  
5  
6 22 The European Medicines Agency. EU Clinical Trials Register. <https://www.clinicaltrialsregister.eu/>  
7  
8 23 Dai F, Silverman DG, Chelly JE, *et al*. Integration of pain score and morphine consumption in  
9 analgesic clinical studies. *J Pain* 2013;**14**:767–77.e8. doi:10.1016/j.jpain.2013.04.004  
10  
11 24 Noether GE. Sample Size Determination for Some Common Nonparametric Tests. *J Am Stat Assoc*  
12 1987;**82**:645–7. doi:10.1080/01621459.1987.10478478  
13  
14 25 Chan KS, Chen W-H, Gan TJ, *et al*. Development and validation of a composite score based on  
15 clinically meaningful events for the opioid-related symptom distress scale. *Qual Life Res*  
16 2009;**18**:1331–40. doi:10.1007/s11136-009-9547-2  
17  
18 26 Yadeau JT, Liu SS, Rade MC, *et al*. Performance characteristics and validation of the Opioid-Related  
19 Symptom Distress Scale for evaluation of analgesic side effects after orthopedic surgery. *Anesth*  
20 *Analg* 2011;**113**:369–77. doi:10.1213/ANE.0b013e31821ae3f7  
21  
22 27 Kleif J, Edwards HM, Sort R, *et al*. Translation and validation of the Danish version of the  
23 postoperative quality of recovery score QoR-15. *Acta Anaesthesiol Scand* 2015;**59**:912–20.  
24 doi:10.1111/aas.12525  
25  
26 28 Apfelbaum JL, Gan TJ, Zhao S, *et al*. Reliability and validity of the perioperative opioid-related  
27 symptom distress scale. *Anesth Analg* 2004;**99**:699–709, table of contents.  
28 doi:10.1213/01.ANE.0000133143.60584.38  
29  
30 29 National Institute of Cancer. Common Terminology Criteria for Adverse Events (CTCAE). *NIH Publ*  
31 2010;**2009**:0–71. doi:10.1080/00140139.2010.489653  
32  
33 30 Ip HYV, Abrishami A, Peng PWH, *et al*. Predictors of postoperative pain and analgesic consumption: a  
34 qualitative systematic review. *Anesthesiology* 2009;**111**:657–77.  
35 doi:10.1097/ALN.0b013e3181aae87a  
36  
37 31 Moher D, Hopewell S, Schulz KF, *et al*. CONSORT 2010 explanation and elaboration: updated  
38 guidelines for reporting parallel group randomised trials. *BMJ* 2010;**340**:c869.  
39  
40 32 Chan A-W, Tetzlaff JM, Gøtzsche PC, *et al*. SPIRIT 2013 explanation and elaboration: guidance for  
41 protocols of clinical trials. *BMJ* 2013;**346**:e7586.  
42  
43 33 Jordan C, Davidovitch RI, Walsh M, *et al*. Spinal anesthesia mediates improved early function and  
44 pain relief following surgical repair of ankle fractures. *J Bone Joint Surg Am* 2010;**92**:368–74.  
45 doi:10.2106/JBJS.H.01852  
46  
47 34 Turk DC, Dworkin RH, McDermott MP, *et al*. Analyzing multiple endpoints in clinical trials of pain  
48 treatments: IMMPACT recommendations. *Pain* 2008;**139**:485–93. doi:10.1016/j.pain.2008.06.025  
49  
50  
51  
52  
53  
54  
55  
56  
57  
58  
59  
60

1  
2  
3  
4  
5  
6  
7  
8  
9  
10  
11  
12  
13  
14  
15  
16  
17  
18  
19  
20  
21  
22  
23  
24  
25  
26  
27  
28  
29  
30  
31  
32  
33  
34  
35  
36  
37  
38  
39  
40  
41  
42  
43  
44  
45  
46  
47  
48  
49  
50  
51  
52  
53  
54  
55  
56  
57  
58  
59  
60

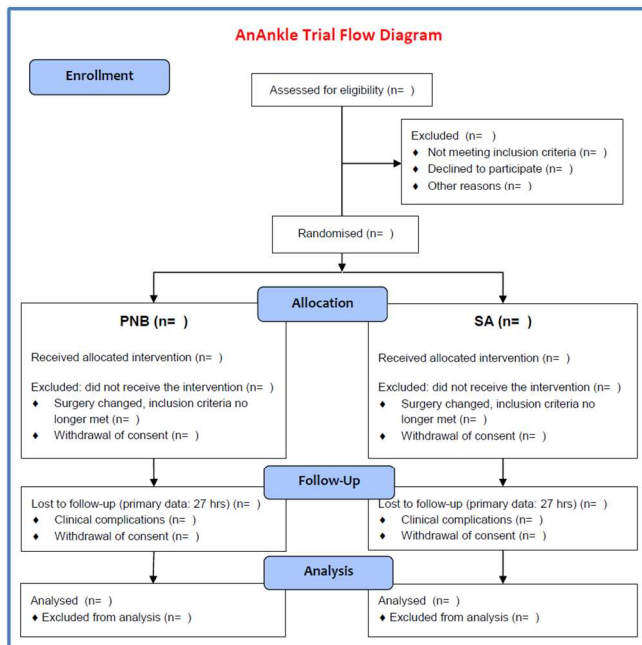

Figure 1: AnAnkle Trial Flow Diagram

123x80mm (300 x 300 DPI)

Review only

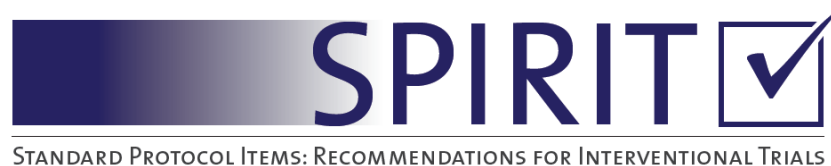

STANDARD PROTOCOL ITEMS: RECOMMENDATIONS FOR INTERVENTIONAL TRIALS

## SPIRIT 2013 Checklist: Recommended items to address in a clinical trial protocol and related documents\*

| Section/item                      | Item No | Description                                                                                                                                                                                                                                                                              | Addressed on page number |
|-----------------------------------|---------|------------------------------------------------------------------------------------------------------------------------------------------------------------------------------------------------------------------------------------------------------------------------------------------|--------------------------|
| <b>Administrative information</b> |         |                                                                                                                                                                                                                                                                                          |                          |
| Title                             | 1       | Descriptive title identifying the study design, population, interventions, and, if applicable, trial acronym                                                                                                                                                                             | ___1___                  |
| Trial registration                | 2a      | Trial identifier and registry name. If not yet registered, name of intended registry                                                                                                                                                                                                     | ___5___                  |
|                                   | 2b      | All items from the World Health Organization Trial Registration Data Set                                                                                                                                                                                                                 | ___1,5___                |
| Protocol version                  | 3       | Date and version identifier                                                                                                                                                                                                                                                              | ___N/A___                |
| Funding                           | 4       | Sources and types of financial, material, and other support                                                                                                                                                                                                                              | ___13___                 |
| Roles and responsibilities        | 5a      | Names, affiliations, and roles of protocol contributors                                                                                                                                                                                                                                  | ___1, 12-13___           |
|                                   | 5b      | Name and contact information for the trial sponsor                                                                                                                                                                                                                                       | ___1___                  |
|                                   | 5c      | Role of study sponsor and funders, if any, in study design; collection, management, analysis, and interpretation of data; writing of the report; and the decision to submit the report for publication, including whether they will have ultimate authority over any of these activities | ___13___                 |
|                                   | 5d      | Composition, roles, and responsibilities of the coordinating centre, steering committee, endpoint adjudication committee, data management team, and other individuals or groups overseeing the trial, if applicable (see Item 21a for data monitoring committee)                         | ___8___                  |



1 **Introduction**

2

3 Background and 6a Description of research question and justification for undertaking the trial, including summary of relevant \_\_\_\_\_ 3 \_\_\_\_\_  
 4 rationale studies (published and unpublished) examining benefits and harms for each intervention  
 5

6 6b Explanation for choice of comparators \_\_\_\_\_ 3 \_\_\_\_\_  
 7

8 Objectives 7 Specific objectives or hypotheses \_\_\_\_\_ 3 \_\_\_\_\_  
 9

10 Trial design 8 Description of trial design including type of trial (eg, parallel group, crossover, factorial, single group),  
 11 allocation ratio, and framework (eg, superiority, equivalence, noninferiority, exploratory) \_\_\_\_\_ 4 \_\_\_\_\_  
 12  
 13

14 **Methods: Participants, interventions, and outcomes**

15

16 Study setting 9 Description of study settings (eg, community clinic, academic hospital) and list of countries where data will  
 17 be collected. Reference to where list of study sites can be obtained \_\_\_\_\_ 4 \_\_\_\_\_  
 18

19 Eligibility criteria 10 Inclusion and exclusion criteria for participants. If applicable, eligibility criteria for study centres and  
 20 individuals who will perform the interventions (eg, surgeons, psychotherapists) \_\_\_\_\_ 4 \_\_\_\_\_  
 21

22 Interventions 11a Interventions for each group with sufficient detail to allow replication, including how and when they will be  
 23 administered \_\_\_\_\_ 6 \_\_\_\_\_  
 24

25 11b Criteria for discontinuing or modifying allocated interventions for a given trial participant (eg, drug dose  
 26 change in response to harms, participant request, or improving/worsening disease) \_\_\_\_\_ 8-9 \_\_\_\_\_  
 27

28 11c Strategies to improve adherence to intervention protocols, and any procedures for monitoring adherence  
 29 (eg, drug tablet return, laboratory tests) \_\_\_\_\_ 6 \_\_\_\_\_  
 30

31 11d Relevant concomitant care and interventions that are permitted or prohibited during the trial \_\_\_\_\_ 6 \_\_\_\_\_  
 32

33 Outcomes 12 Primary, secondary, and other outcomes, including the specific measurement variable (eg, systolic blood  
 34 pressure), analysis metric (eg, change from baseline, final value, time to event), method of aggregation (eg,  
 35 median, proportion), and time point for each outcome. Explanation of the clinical relevance of chosen  
 36 efficacy and harm outcomes is strongly recommended \_\_\_\_\_ 6-8 \_\_\_\_\_  
 37

38 Participant timeline 13 Time schedule of enrolment, interventions (including any run-ins and washouts), assessments, and visits for  
 39 participants. A schematic diagram is highly recommended (see Figure) \_\_\_\_\_ 9+fig.\_\_\_\_  
 40  
 41  
 42  
 43  
 44

1 Sample size 14 Estimated number of participants needed to achieve study objectives and how it was determined, including \_\_\_\_\_5\_\_\_\_\_

2 clinical and statistical assumptions supporting any sample size calculations

3  
4 Recruitment 15 Strategies for achieving adequate participant enrolment to reach target sample size \_\_\_\_\_5,9+fig.\_\_\_\_

5  
6  
7 **Methods: Assignment of interventions (for controlled trials)**

8  
9 Allocation:

10 Sequence 16a Method of generating the allocation sequence (eg, computer-generated random numbers), and list of any \_\_\_\_\_5\_\_\_\_\_

11 generation factors for stratification. To reduce predictability of a random sequence, details of any planned restriction

12 (eg, blocking) should be provided in a separate document that is unavailable to those who enrol participants

13 or assign interventions

14

15

16 Allocation 16b Mechanism of implementing the allocation sequence (eg, central telephone; sequentially numbered, \_\_\_\_\_5\_\_\_\_\_

17 concealment opaque, sealed envelopes), describing any steps to conceal the sequence until interventions are assigned

18 mechanism

19

20

21 Implementation 16c Who will generate the allocation sequence, who will enrol participants, and who will assign participants to \_\_\_\_\_4,5\_\_\_\_\_

22 interventions

23

24

25 Blinding (masking) 17a Who will be blinded after assignment to interventions (eg, trial participants, care providers, outcome \_\_\_\_\_5-6\_\_\_\_\_

26 assessors, data analysts), and how

27

28 17b If blinded, circumstances under which unblinding is permissible, and procedure for revealing a participant's \_\_\_\_\_5-6\_\_\_\_\_

29 allocated intervention during the trial

30

31

32 **Methods: Data collection, management, and analysis**

33

34 Data collection 18a Plans for assessment and collection of outcome, baseline, and other trial data, including any related \_\_\_\_\_6-8\_\_\_\_\_

35 methods processes to promote data quality (eg, duplicate measurements, training of assessors) and a description of

36 study instruments (eg, questionnaires, laboratory tests) along with their reliability and validity, if known.

37 Reference to where data collection forms can be found, if not in the protocol

38

39

40 18b Plans to promote participant retention and complete follow-up, including list of any outcome data to be \_\_\_\_\_8-9\_\_\_\_\_

41 collected for participants who discontinue or deviate from intervention protocols

42

43

44

45

46

47

|    |                                 |     |                                                                                                                                                                                                                                                                                                                                       |                 |
|----|---------------------------------|-----|---------------------------------------------------------------------------------------------------------------------------------------------------------------------------------------------------------------------------------------------------------------------------------------------------------------------------------------|-----------------|
| 1  | Data management                 | 19  | Plans for data entry, coding, security, and storage, including any related processes to promote data quality (eg, double data entry; range checks for data values). Reference to where details of data management procedures can be found, if not in the protocol                                                                     | _____8_____     |
| 2  |                                 |     |                                                                                                                                                                                                                                                                                                                                       |                 |
| 3  |                                 |     |                                                                                                                                                                                                                                                                                                                                       |                 |
| 4  |                                 |     |                                                                                                                                                                                                                                                                                                                                       |                 |
| 5  | Statistical methods             | 20a | Statistical methods for analysing primary and secondary outcomes. Reference to where other details of the statistical analysis plan can be found, if not in the protocol                                                                                                                                                              | _____10_____    |
| 6  |                                 |     |                                                                                                                                                                                                                                                                                                                                       |                 |
| 7  |                                 |     |                                                                                                                                                                                                                                                                                                                                       |                 |
| 8  |                                 | 20b | Methods for any additional analyses (eg, subgroup and adjusted analyses)                                                                                                                                                                                                                                                              | _____10_____    |
| 9  |                                 |     |                                                                                                                                                                                                                                                                                                                                       |                 |
| 10 |                                 | 20c | Definition of analysis population relating to protocol non-adherence (eg, as randomised analysis), and any statistical methods to handle missing data (eg, multiple imputation)                                                                                                                                                       | _____11_____    |
| 11 |                                 |     |                                                                                                                                                                                                                                                                                                                                       |                 |
| 12 |                                 |     |                                                                                                                                                                                                                                                                                                                                       |                 |
| 13 |                                 |     |                                                                                                                                                                                                                                                                                                                                       |                 |
| 14 | <b>Methods: Monitoring</b>      |     |                                                                                                                                                                                                                                                                                                                                       |                 |
| 15 |                                 |     |                                                                                                                                                                                                                                                                                                                                       |                 |
| 16 | Data monitoring                 | 21a | Composition of data monitoring committee (DMC); summary of its role and reporting structure; statement of whether it is independent from the sponsor and competing interests; and reference to where further details about its charter can be found, if not in the protocol. Alternatively, an explanation of why a DMC is not needed | _____8_____     |
| 17 |                                 |     |                                                                                                                                                                                                                                                                                                                                       |                 |
| 18 |                                 |     |                                                                                                                                                                                                                                                                                                                                       |                 |
| 19 |                                 |     |                                                                                                                                                                                                                                                                                                                                       |                 |
| 20 |                                 |     |                                                                                                                                                                                                                                                                                                                                       |                 |
| 21 |                                 |     |                                                                                                                                                                                                                                                                                                                                       |                 |
| 22 |                                 | 21b | Description of any interim analyses and stopping guidelines, including who will have access to these interim results and make the final decision to terminate the trial                                                                                                                                                               | _____N/A_____   |
| 23 |                                 |     |                                                                                                                                                                                                                                                                                                                                       |                 |
| 24 |                                 |     |                                                                                                                                                                                                                                                                                                                                       |                 |
| 25 |                                 |     |                                                                                                                                                                                                                                                                                                                                       |                 |
| 26 | Harms                           | 22  | Plans for collecting, assessing, reporting, and managing solicited and spontaneously reported adverse events and other unintended effects of trial interventions or trial conduct                                                                                                                                                     | _____8_____     |
| 27 |                                 |     |                                                                                                                                                                                                                                                                                                                                       |                 |
| 28 |                                 |     |                                                                                                                                                                                                                                                                                                                                       |                 |
| 29 | Auditing                        | 23  | Frequency and procedures for auditing trial conduct, if any, and whether the process will be independent from investigators and the sponsor                                                                                                                                                                                           | _____8_____     |
| 30 |                                 |     |                                                                                                                                                                                                                                                                                                                                       |                 |
| 31 |                                 |     |                                                                                                                                                                                                                                                                                                                                       |                 |
| 32 |                                 |     |                                                                                                                                                                                                                                                                                                                                       |                 |
| 33 | <b>Ethics and dissemination</b> |     |                                                                                                                                                                                                                                                                                                                                       |                 |
| 34 |                                 |     |                                                                                                                                                                                                                                                                                                                                       |                 |
| 35 | Research ethics approval        | 24  | Plans for seeking research ethics committee/institutional review board (REC/IRB) approval                                                                                                                                                                                                                                             | _____5, 11_____ |
| 36 |                                 |     |                                                                                                                                                                                                                                                                                                                                       |                 |
| 37 |                                 |     |                                                                                                                                                                                                                                                                                                                                       |                 |
| 38 | Protocol amendments             | 25  | Plans for communicating important protocol modifications (eg, changes to eligibility criteria, outcomes, analyses) to relevant parties (eg, investigators, REC/IRBs, trial participants, trial registries, journals, regulators)                                                                                                      | _____N/A_____   |
| 39 |                                 |     |                                                                                                                                                                                                                                                                                                                                       |                 |
| 40 |                                 |     |                                                                                                                                                                                                                                                                                                                                       |                 |
| 41 |                                 |     |                                                                                                                                                                                                                                                                                                                                       |                 |
| 42 |                                 |     |                                                                                                                                                                                                                                                                                                                                       |                 |
| 43 |                                 |     |                                                                                                                                                                                                                                                                                                                                       |                 |
| 44 |                                 |     |                                                                                                                                                                                                                                                                                                                                       |                 |
| 45 |                                 |     |                                                                                                                                                                                                                                                                                                                                       |                 |
| 46 |                                 |     |                                                                                                                                                                                                                                                                                                                                       |                 |
| 47 |                                 |     |                                                                                                                                                                                                                                                                                                                                       |                 |

|    |                               |     |                                                                                                                                                                                                                                                                                     |               |
|----|-------------------------------|-----|-------------------------------------------------------------------------------------------------------------------------------------------------------------------------------------------------------------------------------------------------------------------------------------|---------------|
| 1  | Consent or assent             | 26a | Who will obtain informed consent or assent from potential trial participants or authorised surrogates, and how (see Item 32)                                                                                                                                                        | _____4_____   |
| 2  |                               |     |                                                                                                                                                                                                                                                                                     |               |
| 3  |                               |     |                                                                                                                                                                                                                                                                                     |               |
| 4  |                               | 26b | Additional consent provisions for collection and use of participant data and biological specimens in ancillary studies, if applicable                                                                                                                                               | _____N/A_____ |
| 5  |                               |     |                                                                                                                                                                                                                                                                                     |               |
| 6  |                               |     |                                                                                                                                                                                                                                                                                     |               |
| 7  | Confidentiality               | 27  | How personal information about potential and enrolled participants will be collected, shared, and maintained in order to protect confidentiality before, during, and after the trial                                                                                                | _____8_____   |
| 8  |                               |     |                                                                                                                                                                                                                                                                                     |               |
| 9  |                               |     |                                                                                                                                                                                                                                                                                     |               |
| 10 | Declaration of interests      | 28  | Financial and other competing interests for principal investigators for the overall trial and each study site                                                                                                                                                                       | _____13_____  |
| 11 |                               |     |                                                                                                                                                                                                                                                                                     |               |
| 12 |                               |     |                                                                                                                                                                                                                                                                                     |               |
| 13 |                               |     |                                                                                                                                                                                                                                                                                     |               |
| 14 | Access to data                | 29  | Statement of who will have access to the final trial dataset, and disclosure of contractual agreements that limit such access for investigators                                                                                                                                     | _____13_____  |
| 15 |                               |     |                                                                                                                                                                                                                                                                                     |               |
| 16 |                               |     |                                                                                                                                                                                                                                                                                     |               |
| 17 | Ancillary and post-trial care | 30  | Provisions, if any, for ancillary and post-trial care, and for compensation to those who suffer harm from trial participation                                                                                                                                                       | _____N/A_____ |
| 18 |                               |     |                                                                                                                                                                                                                                                                                     |               |
| 19 |                               |     |                                                                                                                                                                                                                                                                                     |               |
| 20 | Dissemination policy          | 31a | Plans for investigators and sponsor to communicate trial results to participants, healthcare professionals, the public, and other relevant groups (eg, via publication, reporting in results databases, or other data sharing arrangements), including any publication restrictions | _____11_____  |
| 21 |                               |     |                                                                                                                                                                                                                                                                                     |               |
| 22 |                               |     |                                                                                                                                                                                                                                                                                     |               |
| 23 |                               |     |                                                                                                                                                                                                                                                                                     |               |
| 24 |                               |     |                                                                                                                                                                                                                                                                                     |               |
| 25 |                               | 31b | Authorship eligibility guidelines and any intended use of professional writers                                                                                                                                                                                                      | _____11_____  |
| 26 |                               |     |                                                                                                                                                                                                                                                                                     |               |
| 27 |                               | 31c | Plans, if any, for granting public access to the full protocol, participant-level dataset, and statistical code                                                                                                                                                                     | _____N/A_____ |
| 28 |                               |     |                                                                                                                                                                                                                                                                                     |               |
| 29 |                               |     |                                                                                                                                                                                                                                                                                     |               |
| 30 | <b>Appendices</b>             |     |                                                                                                                                                                                                                                                                                     |               |
| 31 |                               |     |                                                                                                                                                                                                                                                                                     |               |
| 32 | Informed consent materials    | 32  | Model consent form and other related documentation given to participants and authorised surrogates                                                                                                                                                                                  | _____N/A_____ |
| 33 |                               |     |                                                                                                                                                                                                                                                                                     |               |
| 34 |                               |     |                                                                                                                                                                                                                                                                                     |               |
| 35 | Biological specimens          | 33  | Plans for collection, laboratory evaluation, and storage of biological specimens for genetic or molecular analysis in the current trial and for future use in ancillary studies, if applicable                                                                                      | _____N/A_____ |
| 36 |                               |     |                                                                                                                                                                                                                                                                                     |               |
| 37 |                               |     |                                                                                                                                                                                                                                                                                     |               |

38  
39 \*It is strongly recommended that this checklist be read in conjunction with the SPIRIT 2013 Explanation & Elaboration for important clarification on the items.  
40 Amendments to the protocol should be tracked and dated. The SPIRIT checklist is copyrighted by the SPIRIT Group under the Creative Commons  
41 [“Attribution-NonCommercial-NoDerivs 3.0 Unported”](https://creativecommons.org/licenses/by-nc-nd/3.0/) license.  
42  
43  
44
